# Supplementary material for: Preventive effect of oral magnesium in postmastectomy pain: protocol for a randomised, double-blind, controlled clinical trial
Source: PubMed Central journal article supplement — BMJ Open. 2018 Oct 4;8(9):e017986. doi: 10.1136/bmjopen-2017-017986 (PMC6173239; doi:10.1136/bmjopen-2017-017986), 2018-10-04
Supplement: bmjopen-2017-017986.draft_revisions.pdf [file bmjopen-2017-017986.draft_revisions.pdf]

# BMJ Open

BMJ Open is committed to open peer review. As part of this commitment we make the peer review history of every article we publish publicly available.

When an article is published we post the peer reviewers' comments and the authors' responses online. We also post the versions of the paper that were used during peer review. These are the versions that the peer review comments apply to.

The versions of the paper that follow are the versions that were submitted during the peer review process. They are not the versions of record or the final published versions. They should not be cited or distributed as the published version of this manuscript.

BMJ Open is an open access journal and the full, final, typeset and author-corrected version of record of the manuscript is available on our site with no access controls, subscription charges or pay-per-view fees (<http://bmjopen.bmj.com>).

If you have any questions on BMJ Open's open peer review process please email [info.bmjopen@bmj.com](mailto:info.bmjopen@bmj.com)

# BMJ Open

## Preventive effect of oral magnesium in mastectomy-induced neuropathic pain: a randomized, double-blind, controlled clinical trial

|                               |                                                                                                                                                                                                                                                                                                                                                            |
|-------------------------------|------------------------------------------------------------------------------------------------------------------------------------------------------------------------------------------------------------------------------------------------------------------------------------------------------------------------------------------------------------|
| Journal:                      | <i>BMJ Open</i>                                                                                                                                                                                                                                                                                                                                            |
| Manuscript ID                 | bmjopen-2017-017986                                                                                                                                                                                                                                                                                                                                        |
| Article Type:                 | Protocol                                                                                                                                                                                                                                                                                                                                                   |
| Date Submitted by the Author: | 20-Sep-2017                                                                                                                                                                                                                                                                                                                                                |
| Complete List of Authors:     | MOREL, Véronique; Centre Hospitalier Universitaire de Clermont-Ferrand, CPC/CIC Inserm 1405, Bât 3C<br>JOLY, Dominique; Centre Jean Perrin<br>VILLATTE, Christine; Centre Jean Perrin<br>Pereira, Bruno; University Hospital CHU Clermont-Ferrand,<br>PICKERING, Gisèle; Centre Hospitalier Universitaire de Clermont-Ferrand, CPC/CIC Inserm 1405, Bât 3C |
| Keywords:                     | Magnesium, NMDA receptor, breast cancer, mastectomy, neuropathic Pain                                                                                                                                                                                                                                                                                      |
|                               |                                                                                                                                                                                                                                                                                                                                                            |

SCHOLARONE™  
Manuscripts

Peer Review Only

1  
2  
3 **Preventive effect of oral magnesium in mastectomy-induced neuropathic pain: a**  
4 **randomized, double-blind, controlled clinical trial**  
5  
6

7 **Short running title**  
8

9 **Magnesium for neuropathic pain prevention**  
10

11  
12 **Trial acronym: MagNet**  
13  
14  
15

16 Véronique Morel<sup>c</sup>, Dominique Joly<sup>d</sup>, Christine Villatte<sup>d</sup>, Bruno Pereira<sup>e</sup>, Gisèle Pickering<sup>a,b,c</sup>,  
17  
18

19  
20 <sup>a</sup> Université Clermont Auvergne, Laboratoire de Pharmacologie, Facultés de  
21 Médecine/Pharmacie, F-63001 Clermont-Ferrand, France.  
22  
23

24 <sup>b</sup> Inserm, U1107 Neuro-Dol, Pharmacologie Fondamentale et Clinique de la Douleur, F-63001  
25 Clermont-Ferrand, France.  
26  
27

28 <sup>c</sup> CHU Clermont-Ferrand, Inserm CIC Inserm 1405, Centre de Pharmacologie Clinique, F-  
29 63003 Clermont-Ferrand, France  
30  
31

32 <sup>d</sup> CHU Clermont-Ferrand, Centre Jean Perrin, Centre de Lutte contre le Cancer, 58 rue  
33 Montalembert, F-63000 Clermont-Ferrand, France.  
34  
35

36 <sup>e</sup> CHU de Clermont-Ferrand, Délégation Recherche Clinique & Innovation - Villa annexe  
37 IFSI, 58 Rue Montalembert, F-63003 Clermont-Ferrand cedex, France.  
38  
39  
40  
41  
42  
43

44 **Correspondence**

45 Véronique MOREL, Centre de Pharmacologie Clinique, Bâtiment 3C, CIC Inserm 1405,  
46 CHU Clermont-Ferrand, BP 69, F-63003 Clermont-Ferrand Cedex 1, France  
47  
48

49 Tel: (+33) 4 73 17 84 11 / Fax: (+33) 4 73 17 84 12  
50

51 E-mail address: v\_morel@chu-clermontferrand.fr  
52  
53  
54  
55  
56  
57  
58

## ABSTRACT

**Introduction:** Breast cancer affects one in ten women worldwide and mastectomy is a cause of chronic pain with neuropathic characteristics. *N*-methyl-D-aspartate receptor (NMDAR) antagonists such as ketamine, memantine, dextromethorphan or magnesium, by blocking NMDAR are used for refractory pain. Oral memantine has been shown to prevent post-mastectomy pain, cognitive impact and maintain quality of life. In a similar fashion, this present study will evaluate the preventive effect of oral magnesium, given upstream of the mastectomy, on neuropathic pain development. As a physiological blocker of NMDAR, magnesium could be an interesting candidate to prevent post-operative pain and associated comorbidities, including cognitive-emotional disorders, multiple analgesics consumption and impaired quality of life.

**Methods and analysis:** A randomized, double-blind, controlled clinical trial (NCT 03063931) includes 100 women with breast cancer undergoing mastectomy at the Oncology Hospital, Clermont-Ferrand, France. Magnesium (100 mg/day; n=50) or placebo (n=50) is administered for six weeks starting two weeks before surgery. Intensity of pain, cognitive-emotional function and quality of life are evaluated with questionnaires. The primary endpoint is pain intensity on a (0-10) numerical rating scale at 1 month post-mastectomy. Data analysis is performed using mixed models and the tests are two-sided, with a type I error set at  $\alpha=0.05$ .

**Ethics and dissemination:** The study protocol and the informed consent have been approved in December 2016 by the French Research Ethics Committee (South East VI Committee). Results will be communicated in different congress and published in international review.

**Trial registration number:** NCT03063931

### Keywords

Magnesium, NMDA receptor, breast cancer, mastectomy, neuropathic Pain

**Abbreviations**

NP, Neuropathic Pain; NMDAR, *N*-Methyl-D-Aspartate receptor

**Date and version identifier**

January 2 2017, Version: 3

**Funding**

University Hospital Clermont-Ferrand, France

**Sponsor**

CHU de Clermont-Ferrand – 58, rue Montalembert, BP 69, F-63003 Clermont-Ferrand Cedex 1, France

**Authors' contributions**

GP is the overall study principal investigator; she participated in the conception and study design and contributed to the writing of the study protocol and the drafting and editing of this manuscript. DJ, CV and BP all participated in the study design. BP contributed to the writing of the study protocol and carried out all statistical calculations and wrote the statistical paragraph in the study protocol. He contributed with GP and VM to the drafting and editing of this manuscript. All authors read and approved the final manuscript.

## INTRODUCTION

Breast cancer is the most common cancer in women worldwide and the lifetime probability of developing breast cancer is 12.3%, approximately 1 in 8.<sup>1</sup> Mastectomy, chemotherapy and radiotherapy play an important role in the development of neuropathic pain. Neuropathic pain is defined as pain related to a lesion or disease affecting the somatosensory system. The mechanisms responsible for spinal hyperexcitability include the activation of central and peripheral *N*-methyl-D-aspartate receptor (NMDAR). These play an ubiquitous role in pain central sensitization and in many other functions like memory and learning.<sup>6,7</sup> Neuropathic pain is associated with the development of a number of comorbidities including cognitive-emotional and sleep disorders.<sup>8</sup> Post-mastectomy pain may be reported in the anterior thorax, armpit, upper arm, and edema, sensory dysfunction, neuroma emergence, numbness in the arm contribute to the pain syndrome that affects 20 to 68% of the patients.<sup>2</sup> NMDAR antagonists such as ketamine, memantine, dextromethorphan or magnesium by blocking NMDAR may limit or even reverse the painful phenomena and are possible drugs for pain refractory to recommended treatments.<sup>9-12</sup>

With a translational approach, the prophylactic effect of memantine in neuropathic pain was recently demonstrated in animals and in humans.<sup>12,13</sup> In a preclinical pain model (Spinal Nerve Ligation) memantine has been shown to prevent neuropathic pain development when administered a few days before surgery. Molecular biology tests showed a decrease of pTyr<sup>1472</sup>NR2B at spinal and supraspinal level (insula and hippocampus).<sup>13</sup> The translational clinical study confirmed the beneficial effect of memantine to prevent post-mastectomy pain development, diminish chemotherapy-induced pain symptoms and analgesic consumption, with a better quality of life for at least 6 months after surgery.<sup>12</sup>

Magnesium is a physiological NMDAR antagonist and blocks calcium and potassium channels of the receptor, modulating NMDAR activation with very few side-effects.<sup>14</sup>

1  
2  
3 Preclinical and clinical pain studies have reported the controverted curative effect of  
4 magnesium on pain with satisfactory<sup>15-30</sup> and mitigated results.<sup>31-40</sup> No study has so far  
5  
6  
7 focused on the preventive effect of several weeks oral administration of magnesium on post-  
8  
9 operative pain and more specifically in post-operative pain related to breast cancer surgery.

10  
11 In the present study, magnesium will be administered before surgery in order to  
12  
13 evaluate its preventive properties on pain development, cognition, emotion and quality of life  
14  
15 during three months after mastectomy. The primary objective is to evaluate if magnesium  
16  
17 administered two weeks before and 4 weeks after mastectomy could prevent pain  
18  
19 development at one month post-mastectomy compared to placebo. The secondary objectives  
20  
21 are the evaluation of pain intensity, analgesic concomitant medications, cognitive-emotional  
22  
23 function, quality of life and sleep one and three months after mastectomy  
24  
25  
26  
27

## 28 **METHODS AND ANALYSIS**

### 29 **Study setting**

30  
31  
32 A randomized, placebo-controlled, double-blind clinical trial will be conducted in the  
33  
34 Oncology Hospital, Clermont-Ferrand, France, in 100 women undergoing total mastectomy  
35  
36 for breast cancer. The study has been approved in December 2016 by the regional Ethics  
37  
38 Committee and registered on February 24 2017 at "<http://www.clinicaltrials.gov>"  
39  
40 (NCT03063931). Three weeks before surgery (D<sub>0-21</sub>), patients will meet the medical team and  
41  
42 the physician will explain to the patient the protocol, the objectives of the study and the  
43  
44 different questionnaires and tests that will be carried out in order for the patient to give her  
45  
46 written informed consent. If necessary, a sufficient time for reflection will be granted. After  
47  
48 having given informed consent, women will rate their pain on the numerical pain scale (NPS)  
49  
50 and complete the cognition, emotion, quality of life and sleep questionnaires. A blood test will  
51  
52 be performed in order to dose the level of magnesium and creatinine, and participants will be  
53  
54  
55  
56  
57

1  
2  
3 randomized in two parallel groups: magnesium (n=50) or placebo (n=50). Patients will be  
4  
5 contacted fifteen days before surgery in order to be reminded them to start their treatment.  
6  
7 Magnesium or placebo (lactose) will be given orally for six weeks starting two weeks before  
8  
9 surgery. Magnesium will be given at the dose of 100 mg/day (2 tablets of 50 mg/day once a  
10  
11 day). Endpoints will be reassessed at one (M1) and three months (M3) post-mastectomy.  
12  
13 Patients will be called once a week by phone in order to maintain a good compliance and to  
14  
15 verify they do not develop adverse events. Finally, a booklet to monitor drug intake and  
16  
17 adverse events will be completed daily by the patient for 3 months from the day of surgery  
18  
19 (D<sub>0</sub>). Detailed information on the present study is summarized in Figure 1.  
20  
21  
22

### 23 **Inclusion criteria**

- 24 1. Patient is at least 18 years old.
- 25
- 26 2. Patient with a diagnosis of breast cancer and with planned total mastectomy with  
27  
28 or without axillary dissection.
- 29
- 30 3. Patient with no change of treatment and diet.
- 31
- 32 4. Patient able to understand and agreeing to follow the study protocol.
- 33  
34  
35  
36  
37

### 38 **Exclusion criteria**

- 39 1. Patient with any magnesium contraindication: hypersensitivity to magnesium  
40  
41 chloride or to any of the excipients.
- 42
- 43 2. Patient with a magnesemia of more than 1.05 mmol/L.
- 44
- 45 3. Patient with severe renal insufficiency and with a renal clearance of less than 30  
46  
47 mL/min.
- 48
- 49 4. Patient with an addiction to alcohol as diagnosed by the investigator.
- 50
- 51 5. Patient with diabetes (Type I and II).
- 52
- 53 6. Patient receiving treatment with quinidine or L-Dopa.
- 54  
55  
56  
57



7. Patient in childbearing age, with no effective contraceptive method, pregnancy or lactation,
8. Patient enrolled in another clinical trial.
9. Patient with an inability to comply with the requirements of the protocol.

## **Intervention**

### **Treatment group**

The treatment group will receive magnesium during six weeks starting two weeks before surgery. Patients in the magnesium group should take once a day 100 mg/day ((2 x 50 mg) of low dose continuous release magnesium stored in opaque white bottles in order to maintain double blinding (CHRONOMAG<sup>®</sup>, FJ Life Sciences).

### **Control group**

Patients will receive once a day two tablets of placebo (lactose) during six weeks starting two weeks before mastectomy.

Magnesium and packaging will be provided by FJ Life Sciences Society. Placebo will be prepared, conditioned and released in the Hospital Central pharmacy by one qualified person according to good manufacturing principles. The number of tablets in each dispensed container will be verified and recounted at the end of the treatment by two persons totally independent of the protocol.

### **Outcome evaluation**

The primary endpoint will be the pain intensity evaluation by NPS in magnesium and placebo groups at M1. The scale ranges from 0 no pain to 10 maximal tolerable pain.

The following secondary endpoints will be evaluated at the screening visit, M1 and M3: 1) pain evaluation with NPS and the McGill pain questionnaire;<sup>41</sup> 2) neuropathic pain questionnaire with the neuropathic pain in four questions (DN4) and the Neuropathic Pain

1  
2  
3 Symptom Inventory questionnaire (NPSI);<sup>42 43</sup> 3) cognition with the Trail Making Test (TMT)  
4 and the Functional Assessment of Cancer Therapy-Cognitive Function (FACT-COG);<sup>44 45</sup> 4)  
5 anxiety and depression with the Depression Anxiety Stress Scale (DASS);<sup>46</sup> 5) quality of life  
6 with European Organization for Research and Treatment of Cancer Quality of Life  
7 Questionnaire Core 30 items (EORTC QLQ-C30) and the Patient Global Impression of  
8 Change (PGIC) and 6) sleep with the Pittsburgh Sleep Quality Index (PSQI).<sup>47-49</sup> At the  
9 inclusion visit, M1 and M3, blood and urinary concentrations of magnesium will be  
10 measured. A summary of the evaluations for one patient is reported in table 1.  
11  
12  
13  
14  
15  
16  
17  
18  
19

20 - *McGill pain questionnaire*<sup>41</sup>

21  
22 This questionnaire allows to qualify pain experience during the last 48 hours. It has fifty eight  
23 qualifiers divided into sixteen items (A to P). Each qualifier is rated from 0 to 4, where 0 =  
24 absent, 1 = low, 2 = moderate, 3 = strong, 4 = very strong. The score is divided between two  
25 subclasses, sensory subclass (items A to I) and emotional subclass (items J to P).  
26  
27  
28  
29  
30

31 - *Neuropathic Pain in 4 questions questionnaire (DN4)*<sup>42</sup>

32  
33 DN4 is a clinical tool for the diagnosis of neuropathic pain. This questionnaire has four  
34 questions divided into 10 items related to the interview (ie, symptoms) and to the sensory  
35 examination (ie, signs). The investigator asks and examines the patient and notes a response  
36 "no" or "yes" for each item: "yes" is scored as "1" and "no" is scored as "0". The sum of  
37 scores gives the total score of the patient (/10). DN4 is considered as positive if the patient  
38 obtains a score  $\geq 4/10$ .  
39  
40  
41  
42  
43  
44  
45  
46

47 - *Neuropathic Pain Symptom Inventory (NPSI)*<sup>43</sup>

48  
49 NPSI is a self-questionnaire and includes 10 pain descriptors. Intensity is rated on 0-10  
50 numerical scales and two temporal items are designed to assess spontaneous ongoing pain  
51 duration and the number of pain paroxysms over 24h. This questionnaire discriminates 5  
52  
53  
54  
55  
56  
57  
58  
59  
60

1  
2  
3 distinct clinically relevant dimensions: spontaneous burning pain, spontaneous deep pain,  
4  
5 paroxysmal pain, evoked pain, and paresthesia/dysesthesia.

6  
7 - *Trail Making Test (TMT)*<sup>44</sup>

8  
9 This non-verbal cognitive test assesses the ability of speed, executive function, attention,  
10 concentration, visual perceptual speed. In Part A, circles are numbered from 1 to 25 and the  
11 patient must connect with lines the numbers in ascending order (1-2-3-4, etc.). In Part B, the  
12 circles contain numbers from 1 to 13 and letters from A to L, the patient must connect the  
13 circles with lines but alternating numbers and letters (1A-2B -3C, etc.). The patient must  
14 connect the circles as quickly as possible for both parts of the test, without lifting the pen  
15 from the paper. The TMT B additionally provides an estimate of mental flexibility.

16  
17 - *Functional Assessment of Cancer Therapy-Cognitive Function (FACT-COG)*<sup>45</sup>

18  
19 This self-report questionnaire has been validated with cancer patients and assesses the  
20 impairment of cognitive ability and its impact on the patient's quality of life. It consists in 37  
21 items assessing memory, attention, concentration, language and thinking abilities. The items  
22 are rated using a 5-point Likert scale. The FACT-COG takes into consideration the functional  
23 implication of cognitive impairment, the deficits observed by other people, the changes in  
24 cognitive function over time, and their impact on the patient's quality of life.

25  
26 - *Depression Anxiety Stress Scale*<sup>46</sup>

27  
28 The DASS is a 42-item self-report instrument designed to measure the three related negative  
29 emotional states of depression, anxiety and tension/stress. The DASS Depression focuses on  
30 reports of low mood, motivation, and self-esteem, DASS-anxiety on physiological arousal,  
31 perceived panic, and fear, and DASS-stress on tension and irritability. A respondent indicates  
32 on a 4-point scale the extent to which each of 42 statements applied over the past week. A  
33 printed overlay is used to obtain total scores for each subscale. Higher scores on each subscale  
34 indicate increasing severity of depression, anxiety or stress.

1  
2  
3 - *European Organization for Research and Treatment of Cancer Quality of Life*  
4  
5 *Questionnaire Core 30 items (EORTC QLQ-C30)*<sup>47</sup>  
6

7 This questionnaire assesses the quality of life of cancer patients. It is divided in 9 subscales  
8 consisting of several items: 5 subscales measuring functional status (physical, role, social,  
9 emotional, cognitive), three subscales measuring symptoms (fatigue, pain, nausea and  
10 vomiting) and a global subscale of quality of life and health. Finally, six items/isolated  
11 symptoms, covering cancer symptoms and frequent side effects of cancer therapies are also  
12 included in the EORTC QLQ-C30.  
13  
14  
15  
16  
17  
18

19  
20 - *Patient Global Impression of Change*<sup>48</sup>  
21

22 This is a 7-point self-reported numerical scale used to assess what the change in their  
23 condition following treatment meant to the patient.  
24  
25  
26

27 - *Pittsburgh Sleep Quality Index*<sup>49</sup>  
28

29 This questionnaire consists of 19 items and is used to measure sleep quality. It consists of 7  
30 domains: subjective sleep quality, sleep latency, sleep duration, habitual sleep efficiency,  
31 sleep disturbances, use of sleep medication and daytime dysfunction.  
32  
33  
34  
35  
36

### 37 **Recruitment and Randomization**

38  
39 Three weeks before mastectomy, when the informed consent is signed, blood samples  
40 (magnesium and creatinine concentrations) and questionnaires will be performed. Then,  
41 patients will be randomized in the magnesium (n=50) or placebo group (n=50). Treatment  
42 allocation will follow a predetermined randomization list and will be carried out by a person  
43 totally independent from the protocol. The randomization sequence will be generated using  
44 random blocks. Treatments will be packed in a similar opaque bottle covered with an identical  
45 label indicating batch number, expiry date and sponsor code with no indication of the name of  
46 the drug. In order to maintain blinding, the physician who evaluated pain could not guess  
47 allocation at any time and would not meet the patient again in the course of the trial.  
48  
49  
50  
51  
52  
53  
54  
55  
56  
57

### Sample size calculation

The number of subjects required is 100 patients with breast cancer undergoing total mastectomy (50 in each group). The minimum  $\delta$  difference in numerical pain scale between magnesium and placebo groups at M1 is estimated at 1.0 and  $\sigma$  standard deviation at 1.5 with  $\alpha = 0.05$  two-sided situation and  $\beta = 0.10$ .

### Statistical analysis

Statistical analyses will be performed with Stata software (version 13; StataCorp, College Station, US). Concerning the primary objective, comparison between the randomized groups will be performed using the Student test or the Mann and Whitney test (if the conditions for validity of the Student test are not respected, normality verified by Shapiro-Wilk and homoscedasticity by Fisher-Snedecor test). The recommendations proposed by Vickers and Altman (Vickers and Altman, 2001) will be implemented.<sup>50</sup> Thus, a covariance analysis considering the measure of average pain at inclusion as a covariate will be proposed. The confounding factors likely to influence the primary endpoint (para-vertebral block, breast reconstruction with latissimus dorsi muscle flap) will be taking into account in multivariate regression analysis. Concerning anesthesia, it is generally standardized and the authorized treatment will be noted. There will be a systematic adjustment for the main analysis. The analysis of repeated data (at the inclusion, M1 and M3) will be carried out by mixed models which allow to consider, on the one hand, time, group and their interaction time x group as fixed effects and on the other hand, the within and between subject variability. A sensitivity analysis will be considered to measure the impact of missing data and to assess the problem caused by missing longitudinal data at M3. Estimation methods developed by Verbeke and Molenberghs will be proposed.<sup>51</sup>

### **Data handling and record keeping**

All original records such as consent forms, Case Report Forms, questionnaires and pain diary will be archived at trial sites for 15 years. The database file will be anonymized and maintained also for 15 years. The monitoring will be performed by a clinical research associated independent from the protocol. Then, the monitored case report forms will be transferred to the Data Management Center (CIC-Inserm 1405, Clermont-Ferrand).

### **Duration of the study**

The duration of treatment will be 42 days. The total duration of participation per patient will be of 14 weeks. The protocol will include 4 visits (D<sub>0-21</sub>/D<sub>0</sub>/M1/M3) including a period of hospitalization per patient. Treatment will be given daily starting two weeks before surgery and maintained four weeks after. The recruitment will start in June 2017. The total duration of the study is estimated at two years.

### **ETHICS AND DISSEMINATION**

The study received approval by the French Research Ethics Committee on December 2016 (ID-RCB n° 2016-A01749-42). The trial is registered in ClinicalTrials.gov (trial n° NCT03063931). Each patient meeting the inclusion criteria will sign a Consent Form after receiving oral and written information. After agreement between all investigators, data will be disclosed and results will be communicated in different congress and published in international review.

### **DISCUSSION**

Following successful results obtained with prophylactic memantine in neuropathic pain development,<sup>12 13</sup> this study aims at assessing magnesium treatment in a similar protocol to prevent neuropathic pain induced by mastectomy. In breast cancer surgery, clinical studies using magnesium have focused so far on the qualitative and emotional aspects of pain rather

1  
2  
3 than on the intensity of pain itself.<sup>52</sup> Magnesium in neuropathic pain alleviation has shown  
4  
5 controverted results.<sup>19-36</sup> Magnesium has been shown to modulate the limbic system *via*  
6  
7 NMDAR and these brain areas are known to be involved in emotion and pain.<sup>53</sup> It is therefore  
8  
9 essential to evaluate concomitantly magnesium effect on pain and also on cognitive-emotional  
10  
11 and sleep aspects. Magnesium deprivation may affect cognition and sleep quality. Preclinical  
12  
13 findings showed that an increase in brain magnesium enhances both short-term synaptic  
14  
15 facilitation and long-term potentiation and improves learning and memory functions.<sup>54</sup> In  
16  
17 human, a study showed that preeclampsia patient receiving magnesium had better attention  
18  
19 and working memory performance both before and after delivery compared to controls.<sup>55</sup>  
20  
21 Furthermore, a review reported the relationship between low level of magnesium, stress and  
22  
23 cognitive difficulties such as lack of concentration and difficulties in learning.<sup>56</sup> Concerning  
24  
25 the impact of magnesium on sleep, a placebo-controlled, randomized cross-over study  
26  
27 performed in 12 older participants showed that magnesium supplementation significantly  
28  
29 reversed electroencephalogram changes, including decreased slow wave sleep, that may occur  
30  
31 during aging.<sup>57</sup> Furthermore, a double blind trial reported that intraoperative infusion of  
32  
33 magnesium led to a significantly better quality of sleep during the post-operative period  
34  
35 without any side-effects.<sup>58</sup>  
36  
37  
38

39  
40 Magnesium is an abundant mineral, naturally present in food and is available as a  
41  
42 dietary supplement that is appreciated by patients.<sup>59</sup> It is obtained without prescription and has  
43  
44 a favourable risk-benefit balance with few side effects.<sup>59</sup> This molecule is also known to  
45  
46 regulate diverse biochemical reactions in the body and is required for energy production,  
47  
48 oxidative phosphorylation, and glycolysis. It also plays a role in the active transport of  
49  
50 calcium and potassium ions across cell membranes, a process that is important to nerve  
51  
52 impulse conduction, muscle contraction, and normal heart rhythm.<sup>60 61</sup> Low blood levels of  
53  
54 magnesium have been associated with a number of pathologies including type-2 diabetes, or  
55  
56  
57  
58  
59  
60

1  
2  
3 cardio-vascular disease.<sup>62</sup> Oral magnesium supplementation is usually well tolerated and  
4  
5 gastrointestinal side effects including nausea, vomiting, and diarrhea are usually minor.<sup>62 63</sup>  
6

7 The pharmaceutical form in this trial provides magnesium chloride, a circulating form  
8  
9 of magnesium with a gradual and constant release of low doses of magnesium along the  
10  
11 gastro intestinal tract. A recent clinical study (NCT01935570) showed that the dose of 100 mg  
12  
13 daily guarantees an optimal absorption of magnesium by the body over a 24-hour period.  
14  
15 Furthermore, this form of magnesium does not induce intestinal side effects and is easy to use  
16  
17 with a once a day intake.  
18  
19

20 In conclusion, if magnesium given before and after mastectomy proves its efficacy in  
21  
22 neuropathic pain prevention, it could be an excellent prophylactic strategy to prevent post-  
23  
24 mastectomy pain symptoms, maintain quality of life and cognitive function and limit  
25  
26 comorbidities that accompany breast cancer pathology.  
27  
28  
29

### 30 **Competing interests**

31  
32 The authors declare that there are no financial or non-financial competing interests neither  
33  
34 within the conception nor conduction of the trial.  
35  
36  
37  
38  
39  
40  
41  
42  
43  
44  
45  
46  
47  
48  
49  
50  
51  
52  
53  
54  
55  
56  
57  
58  
59  
60



## References

1. Rojas K, Stuckey A. Clin Obstet Gynecol. *Breast Cancer Epidemiology and Risk Factors*. 2016; 59(4):651-672.
2. Labrèze L, Lakdja F, Dixmérias F, and Monnin D. Les douleurs chroniques post-mastectomie. *Douleur et Analgésie* 2009;22:30-37.
3. Collins S, Sigtermans MJ, Dahan A, Zuurmond WW, Perez RS. NMDA receptor antagonists for the treatment of neuropathic pain. *Pain Med* 2010; 11(11):1726-42.
4. Niesters M, and Dahan A. Pharmacokinetic and pharmacodynamic considerations for NMDA receptor antagonists in the treatment of chronic neuropathic pain. *Expert Opin. Drug Metab. Toxicol* 2012; 8:1409–1417.
5. Zhou HY, Chen SR, Pan HL.. Targeting N-methyl-D-aspartate receptors for treatment of neuropathic pain. *Expert Rev Clin Pharmacol* 2011;4(3):379-88.
6. Pickering, G. La voie glutamatergique: aspects physiologiques et pharmacologiques du récepteur NMDA. *Lett. Pharmacol. Supplément* 2010;23:4-12.
7. Rogawski, MA, and Wenk, GL. The Neuropharmacological Basis for the Use of Memantine in the Treatment of Alzheimer's Disease. *CNS Drug Rev* 2003; 9:275–308.
8. Vandebossche S, Fery P and Razavi D. Cognitive impairments and breast cancer: a critical review of the literature. *Bull Cancer* 2009;96:239-248.
9. Bell RF. Ketamine for chronic, non-cancer pain. *Pain* 2009;141:210-214.
10. Zhou HY, Chen SR, and Pan HL. Targeting N-methyl-D-aspartate receptors for treatment of neuropathic pain. *Expert Rev. Clin. Pharmacol* 2011;4:379–388.
11. Ehret, G.B., Daali, Y., Chabert, J., Rebsamen, M., Wolff, A., Forster, A., Moursli, F., Fritschy, D., Rossier, M.F., Piguet, V., et al. Influence of CYP2D6 activity on

- 1  
2 pre-emptive analgesia by the N-methyl-D-aspartate antagonist dextromethorphan  
3 in a randomized controlled trial of acute pain. *Pain Physician* 2013; 16:45–56.  
4  
5  
6  
7 12. Morel V, Joly D, Villatte C, Dubray C, Durando X, Daulhac L, Coudert C, Roux  
8 D, Pereira B, Pickering G. Memantine before Mastectomy Prevents Post-Surgery  
9 Pain: A Randomized, Blinded Clinical Trial in Surgical Patients. *PLoS One* 2016;  
10 11(4):e0152741.  
11  
12  
13  
14  
15 13. Morel V, Etienne M, Wattiez AS, Dupuis A, Privat AM, Chalus M, Eschalier A,  
16 Daulhac L, Pickering G. Memantine, a promising drug for the prevention of  
17 neuropathic pain in rat. *Eur J Pharmacol* 2013;721(1-3):382-90.  
18  
19  
20  
21  
22 14. Woolf CJ, Thompson SW. The induction and maintenance of central sensitization  
23 is dependent on N-methyl-d-aspartic acid receptor activation; implications for the  
24 treatment of post-injury pain hypersensitivity states. *Pain* 1991;44:293–299  
25  
26  
27  
28 15. Begon S, Pickering G, Eschalier A, Dubray C. Magnesium and MK-801 have a  
29 similar effect in two experimental models of neuropathic pain. *Brain Res* 2000;  
30 887(2):436-9.  
31  
32  
33  
34 16. Begon S, Pickering G, Eschalier A, Dubray C. Magnesium increases morphine  
35 analgesic effect in different experimental models of pain. *Anesthesiology* 2002;  
36 96(3):627-32.  
37  
38  
39  
40 17. Begon S, Pickering G, Eschalier A, Mazur A, Rayssiguier Y, Dubray C. Role of  
41 spinal NMDA receptors, protein kinase C and nitric oxide synthase in the  
42 hyperalgesia induced by magnesium deficiency in rats. *Br J Pharmacol* 2001;  
43 134(6):1227-36.  
44  
45  
46  
47 18. Hasanein P, Parviz M, Keshavarz M, Javanmardi K, Mansoori M, Soltani N. Oral  
48 magnesium administration prevents thermal hyperalgesia induced by diabetes in  
49 rats. *Diabetes Res Clin Pract* 2006;73(1):17-22.  
50  
51  
52  
53  
54  
55  
56  
57  
58  
59  
60

- 1  
2  
3 19. Apan A, Buyukkocak U, Ozcan S, Sari E, Basar H. Postoperative magnesium  
4 sulphate infusion reduces analgesic requirements in spinal anaesthesia. *Eur J*  
5 *Anaesthesiol* 2004; 21(10):766-9.  
6  
7  
8  
9 20. Kara H, Sahin N, Ulasan V, Aydogdu T. Magnesium infusion reduces  
10 perioperative pain. *Eur J Anaesthesiol* 2002; 19(1):52-6.  
11  
12  
13 21. Levaux Ch, Bonhomme V, Dewandre PY, Brichant JF, Hans P. Effect of intra-  
14 operative magnesium sulphate on pain relief and patient comfort after major  
15 lumbar orthopaedic surgery. *Anaesthesia* 2003; 58(2):131-5.  
16  
17  
18 22. Shah PN, Dhengle Y. Magnesium sulfate for postoperative analgesia after surgery  
19 under spinal anesthesia. *Acta Anaesthesiol Taiwan* 2016; 54(2):62-4.  
20  
21  
22 23. Steinlechner B, Dworschak M, Birkenberg B, Grubhofer G, Weigl M, Schiferer A,  
23 Lang T, Rajek A. Magnesium moderately decreases remifentanil dosage required  
24 for pain management after cardiac surgery. *Br J Anaesth* 2006; 96(4):444-9.  
25  
26  
27 24. Brill S, Sedgwick PM, Hamann W, Di Vadi PP. Efficacy of intravenous  
28 magnesium in neuropathic pain. *Br J Anaesth* (2002); 89(5):711-4.  
29  
30  
31 25. Crosby V, Wilcock A, Corcoran R. The safety and efficacy of a single dose (500  
32 mg or 1 g) of intravenous magnesium sulfate in neuropathic pain poorly responsive  
33 to strong opioid analgesics in patients with cancer. *J Pain Symptom Manage* 2000;  
34 19(1):35-9.  
35  
36  
37 26. Jaitly V. Efficacy of intravenous magnesium in neuropathic pain. *Br J Anaesth*  
38 2003; 91(2):302.  
39  
40  
41 27. Peikert A, Wilimzig C, Kohne-Volland R. Prophylaxis of migraine with oral  
42 magnesium: results from a prospective, multi-center, placebo-controlled and  
43 double-blind randomized study. *Cephalalgia* 1996;16(4):257-63.  
44  
45  
46  
47  
48  
49  
50  
51  
52  
53  
54  
55  
56  
57  
58  
59  
60

- 1  
2  
3 28. Pfaffenrath V, Wessely P, Meyer C, Isler HR, Evers S, Grotemeyer KH, Taneri Z,  
4 Soyka D, Gobel H, Fischer M. (1996) Magnesium in the prophylaxis of migraine--  
5 a double-blind placebo-controlled study. *Cephalalgia* 1996;16(6):436-40.  
6  
7  
8  
9 29. Shechter M, Bairey Merz CN, Stuehlinger HG, Slany J, Pachinger O, Rabinowitz  
10 B. Effects of oral magnesium therapy on exercise tolerance, exercise-induced chest  
11 pain, and quality of life in patients with coronary artery disease. *Am J Cardiol*  
12 2003; 91(5):517-21.  
13  
14  
15 30. Wang F, Van Den Eeden SK, Ackerson LM, Salk SE, Reince RH, Elin RJ. Oral  
16 magnesium oxide prophylaxis of frequent migrainous headache in children: a  
17 randomized, double-blind, placebo-controlled trial. *Headache* 2003; 43(6):601-10.  
18  
19  
20 31. Baaklini LG, Arruda GV, Sakata RK. Assessment of the Analgesic Effect of  
21 Magnesium and Morphine in Combination in Patients With Cancer Pain: A  
22 Comparative Randomized Double-Blind Study. *Am J Hosp Palliat Care*  
23 2017;34(4):353-3572015.  
24  
25  
26 32. Bhatia A, Kashyap L, Pawar DK, Trikha A. Effect of intraoperative magnesium  
27 infusion on perioperative analgesia in open cholecystectomy. *J Clin Anesth* 2004;  
28 16(4):262-5.  
29  
30  
31 33. Ko SH, Lim HR, Kim DC, Han YJ, Choe H, Song HS. (2001) Magnesium sulfate  
32 does not reduce postoperative analgesic requirements. *Anesthesiology* 2001;  
33 95(3):640-6.  
34  
35  
36 34. O'Flaherty JE, Lin CX. Does ketamine or magnesium affect posttonsillectomy pain  
37 in children? *Paediatr Anaesth* 2003; 13(5):413-21.  
38  
39  
40 35. Tramer MR, Schneider J, Marti RA, Rifat K. Role of magnesium sulfate in  
41 postoperative analgesia. *Anesthesiology* 1996; 84(2):340-7.  
42  
43  
44  
45  
46  
47  
48  
49  
50  
51  
52  
53  
54  
55  
56  
57  
58  
59  
60

- 1  
2  
3 36. Tramèr MR, Glynn CJ. An evaluation of a single dose of magnesium to  
4 supplement analgesia after ambulatory surgery: randomized controlled trial. *Anesth*  
5 *Analg* 2007; 104(6):1374-9.  
6  
7  
8  
9 37. Pickering G, Morel V, Simen E, Cardot JM, Moustafa F, Delage N, Picard P,  
10 Eschalier S, Boulliau S, Dubray C. Oral magnesium treatment in patients with  
11 neuropathic pain: a randomized clinical trial. *Magnes Res* 2011; 24(2):28-35.  
12  
13  
14 38. Lysakowski C, Dumont L, Czarnetzki C et al. Magnesium as an adjuvant to  
15 postoperative analgesia: a systematic review of randomized trials. *Anesth Analg*  
16 2007;104:1532-9.  
17  
18  
19 39. Felsby S, Nielsen J, Arendt-Nielsen L et al. NMDA receptor blockade in chronic  
20 neuropathic pain: a comparison of ketamine and magnesium chloride. *Pain*  
21 1996;64:283-91.  
22  
23  
24 40. Mikkelsen S, Dirks J, Fabricius P et al. Effect of intravenous magnesium on pain  
25 and secondary hyperalgesia associated with the heat/capsaicin sensitization model  
26 in healthy volunteers. *Br J Anaesth* 2001;86:871-3  
27  
28  
29 41. Boureau F, Luu M, Doubrère JF. Comparative study of the validity of four French  
30 McGill Pain Questionnaire (MPQ) versions. *Pain* 1992; 50(1):59-65.  
31  
32  
33 42. Bouhassira D, Attal N, Alchaar H, Boureau F, Brochet B, Bruxelle J, Cunin G,  
34 Fermanian J, Ginies P, Grun-Overdyking A, Jafari-Schluep H, Lanteri-Minet M,  
35 Laurent B, Mick G, Serrie A, Valade D, Vicaut E. Comparison of pain syndromes  
36 associated with nervous or somatic lesions and development of a new neuropathic  
37 pain diagnostic questionnaire (DN4). *Pain* 2005; 114(1-2):29-36.  
38  
39  
40 43. Bouhassira D, Attal N, Fermanian J, Alchaar H, Gautron M, Masquelier E,  
41 Rostaing S, Lanteri-Minet M, Collin E, Grisart J, Boureau F. Development and  
42 validation of the Neuropathic Pain Symptom Inventory. *Pain* 2004;108(3):248-57.  
43  
44  
45  
46  
47  
48  
49  
50  
51  
52  
53  
54  
55  
56  
57  
58  
59  
60

- 1  
2  
3 44. Tombaugh TN. Trail Making Test A and B: normative data stratified by age and  
4 education. *Arch Clin Neuropsychol* 2004;19(2):203-14.  
5  
6  
7 45. Wagner L, Sweet J, Butt Z, Lai J, Cella D. Measuring patient self-reported  
8 cognitive function: development of the functional assessment of cancer therapy-  
9 cognitive function instrument. *J Support Oncol* 2009;7:W32-9.  
10  
11  
12 46. Lovibond SH, Lovibond PF. Manual for the Depression Anxiety and Stress Scales  
13 (second edition). *Psychology Foundation*.  
14  
15  
16 47. Aaronson NK, Ahmedzai S, Bergman B, Bullinger M, Cull A, Duez NJ, et al. The  
17 European Organization for Research and Treatment of Cancer QLQ-C30: a  
18 quality-of-life instrument for use in international clinical trials in oncology. *J Natl*  
19 *Cancer Inst* 1993;85:365-76.  
20  
21  
22 48. Hurst H, Bolton J. Assessing the clinical significance of change scores recorded on  
23 subjective outcome measures. *J Manipulative Physiol Ther* 2004;27:26-35.  
24  
25  
26 49. Buysse DJ, Reynolds CF, Monk TH, Berman SR, Kupfer DJ. The Pittsburgh Sleep  
27 Quality Index: a new instrument for psychiatric practice and research. *Psychiatry*  
28 *Res* 1989;28:193-213.  
29  
30  
31 50. Vickers AJ, Altman DG: Statistics notes: analysing controlled trials with baseline  
32 and follow up measurements. *BMJ* 2001;323: 1123-1124.  
33  
34  
35 51. Verbeke G, Fieuws S, Molenberghs G, Davidian MA. The analysis of multivariate  
36 longitudinal data: review *Stat Methods Med Res* 2014, 23: 42-59.  
37  
38  
39 52. Tao MH, Dai Q, Millen AE, Nie J, Edge SB, Trevisan M, Shields PG,  
40 Freudenheim JL. Associations of intakes of magnesium and calcium and survival  
41 among women with breast cancer: results from Western New York Exposures and  
42 Breast Cancer (WEB) Study. *Am J Cancer Res* 2015. 6(1):105-13.  
43  
44  
45  
46  
47  
48  
49  
50  
51  
52  
53  
54  
55  
56  
57  
58  
59  
60

- 1  
2  
3 53. Bardgett ME, Schultheis PJ, McGill DL, Richmond RE, Wagge JR. Magnesium  
4 deficiency impairs fear conditioning in mice. *Brain Res* 2005; 1038(1):100-6.  
5  
6  
7 54. Slutsky I, Abumaria N, Wu LJ, Huang C, Zhang L, Li B, Zhao X, Govindarajan A,  
8 Zhao MG, Zhuo M, Tonegawa S, Liu G. Enhancement of learning and memory by  
9 elevating brain magnesium. *Neuron*. 2010 Jan 28;65(2):165-77.  
10  
11  
12 55. Rana S, Lindheimer M, Hibbard J, Pliskin N. Neuropsychological performance in  
13 normal pregnancy and preeclampsia. *Am J Obstet Gynecol*. 2006 Jul;195(1):186-  
14 91. Epub 2006 Mar 31.  
15  
16  
17 56. Moncayo R, Ortner K. Multifactorial determinants of cognition - Thyroid function  
18 is not the only one. *BBA Clin*. 2015 Apr 22;3:289-98.  
19  
20  
21 57. Held K, Antonijevic IA, Kunzel H, Uhr M, Wetter TC, Golly IC, Steiger A, Murck  
22 H. Oral Mg (2+) supplementation reverses age-related neuroendocrine and sleep  
23 EEG changes in humans. *Pharmacopsychiatry* 2002; 35: 135-43  
24  
25  
26 58. Bhatia A1, Kashyap L, Pawar DK, Trikha A. Effect of intraoperative magnesium  
27 infusion on perioperative analgesia in open cholecystectomy. *J Clin Anesth*. 2004  
28 Jun;16(4):262-5.  
29  
30  
31 59. National Institutes of Health Office of Dietary Supplements. Magnesium.  
32 <http://ods.od.nih.gov/factsheets/magnesium.asp>. Accessed January 12, 2009.  
33  
34  
35 60. Newhouse IJ, Finstad EW. The effects of magnesium supplementation on exercise  
36 performance. *Clin J Sport Med*. 2000;10(3):195-200.  
37  
38  
39 61. Chubanov V, Gudermann T, Schlingmann KP. Essential role for TRPM6 in  
40 epithelial magnesium transport and body magnesium homeostasis. *Pflugers Arch*.  
41 2005;451(1):228-234.  
42  
43  
44 62. Guerrero MP, Volpe SL, Mao JJ. Therapeutic uses of magnesium. *Am Fam*  
45 *Physician*. 2009 Jul 15;80(2):157-62.  
46  
47  
48  
49  
50  
51  
52  
53  
54  
55  
56  
57  
58  
59  
60

- 1  
2  
3 63. McKevooy GK, ed. AHFS Drug Information. Bethesda, Md.: *American Society of*  
4  
5 *Health-System Pharmacists*; 1998.  
6  
7  
8  
9  
10  
11  
12  
13  
14  
15  
16  
17  
18  
19  
20  
21  
22  
23  
24  
25  
26  
27  
28  
29  
30  
31  
32  
33  
34  
35  
36  
37  
38  
39  
40  
41  
42  
43  
44  
45  
46  
47  
48  
49  
50  
51  
52  
53  
54  
55  
56  
57  
58  
59  
60

For peer review only



Figure 1: Study design

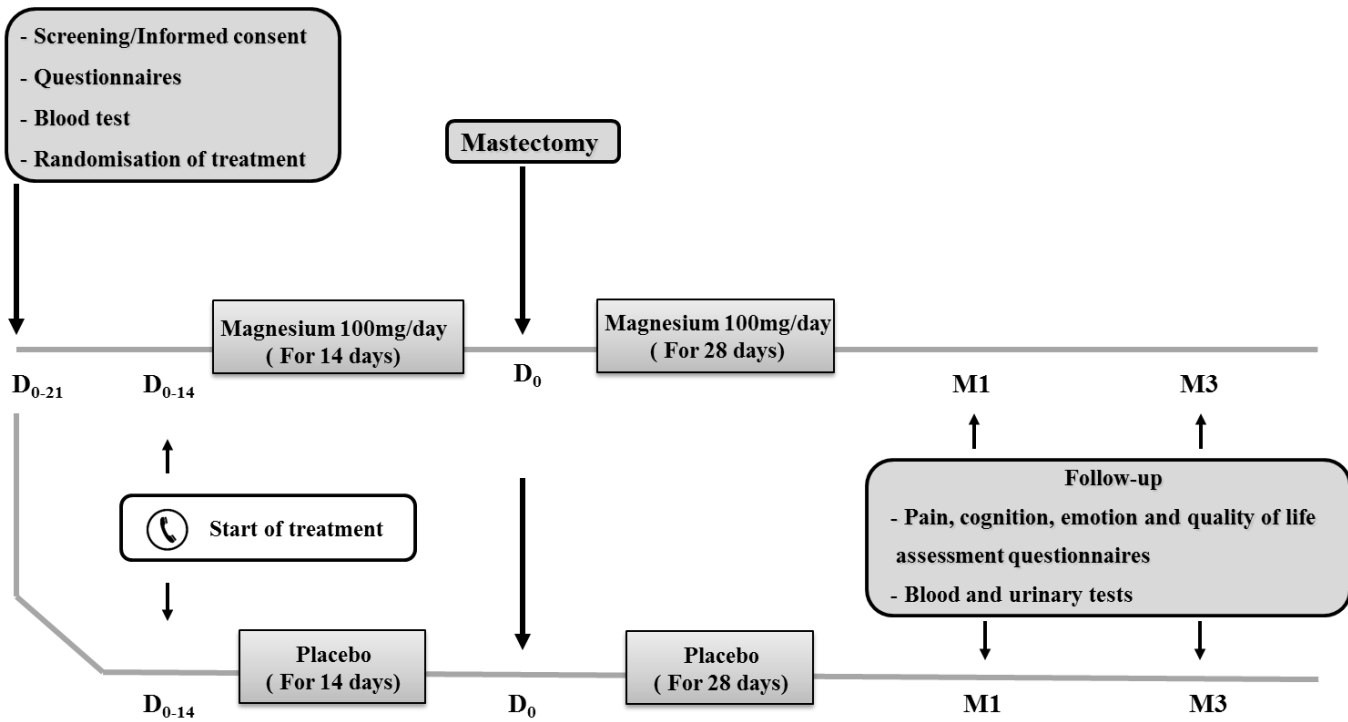

Table 1: Summary of assessments

| TIMEPOINT                                                             | STUDY PERIOD |            |                 |    |           |
|-----------------------------------------------------------------------|--------------|------------|-----------------|----|-----------|
|                                                                       | Enrolment    | Allocation | Post-allocation |    | Close-out |
|                                                                       | D0-21        | D0-14      | D0              | M1 | M3        |
| <b>ENROLMENT:</b>                                                     |              |            |                 |    |           |
| Eligibility screen                                                    | X            |            |                 |    |           |
| Informed consent                                                      | X            |            |                 |    |           |
| Allocation                                                            |              | X          |                 |    |           |
| <b>INTERVENTIONS:</b>                                                 |              |            |                 |    |           |
| Start of treatment                                                    |              | X          |                 |    |           |
| End of treatment                                                      |              |            |                 | X  |           |
| Surgery                                                               |              |            | X               |    |           |
| Blood test                                                            | X            |            |                 | X  | X         |
| Urinary test                                                          |              |            |                 | X  | X         |
| Delivrey pain diary                                                   |              |            | X               |    |           |
| <b>ASSESSMENTS:</b>                                                   |              |            |                 |    |           |
| Numeric Pain Scale (NPS)                                              | X            |            |                 | X  | X         |
| Neuropathic Pain four questions (DN4)                                 | X            |            |                 | X  | X         |
| Neuropathic Pain Symptom Inventory (NPSI)                             | X            |            |                 | X  | X         |
| McGill Pain questionnaire                                             | X            |            |                 | X  | X         |
| Trail Making Test (TMT)                                               | X            |            |                 | X  | X         |
| Functional Assessment of Cancer Therapy-Cognitive Function (FACT-COG) | X            |            |                 | X  | X         |
| EORTC QLQ-C30                                                         | X            |            |                 | X  | X         |
| Depression Anxiety Stress Scale (DASS)                                | X            |            |                 | X  | X         |
| Pittsburgh Sleep Quality Index (PSQI)                                 | X            |            |                 | X  | X         |
| Patient Global Impression of Change (PGIC)                            | X            |            |                 | X  | X         |
| Concomitant analgesic treatments                                      | X            | X          | X               | X  | X         |
| Adverse events                                                        |              |            | X               | X  | X         |

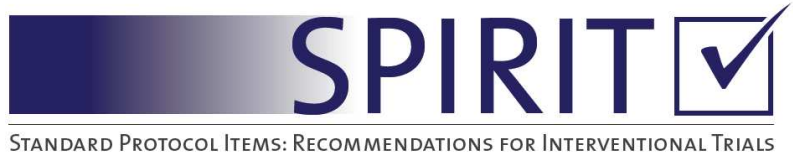

1  
2  
3  
4  
5  
6  
7  
8  
9  
10  
11  
12  
13  
14  
15  
16  
17  
18  
19  
20  
21  
22  
23  
24  
25  
26  
27  
28  
29  
30  
31  
32  
33  
34  
35  
36  
37  
38  
39  
40  
41  
42  
43  
44  
45  
46  
47

SPIRIT 2013 Checklist: Recommended items to address in a clinical trial protocol and related documents\*

| Section/item                      | Item No | Description                                                                                                                                                                                                                                                                              | Addressed on page number |
|-----------------------------------|---------|------------------------------------------------------------------------------------------------------------------------------------------------------------------------------------------------------------------------------------------------------------------------------------------|--------------------------|
| <b>Administrative information</b> |         |                                                                                                                                                                                                                                                                                          |                          |
| Title                             | 1       | Descriptive title identifying the study design, population, interventions, and, if applicable, trial acronym                                                                                                                                                                             | ___1___                  |
| Trial registration                | 2a      | Trial identifier and registry name. If not yet registered, name of intended registry                                                                                                                                                                                                     | ___2___                  |
|                                   | 2b      | All items from the World Health Organization Trial Registration Data Set                                                                                                                                                                                                                 | ___NA___                 |
| Protocol version                  | 3       | Date and version identifier                                                                                                                                                                                                                                                              | ___3___                  |
| Funding                           | 4       | Sources and types of financial, material, and other support                                                                                                                                                                                                                              | ___3___                  |
| Roles and responsibilities        | 5a      | Names, affiliations, and roles of protocol contributors                                                                                                                                                                                                                                  | ___1 and 3___            |
|                                   | 5b      | Name and contact information for the trial sponsor                                                                                                                                                                                                                                       | ___3___                  |
|                                   | 5c      | Role of study sponsor and funders, if any, in study design; collection, management, analysis, and interpretation of data; writing of the report; and the decision to submit the report for publication, including whether they will have ultimate authority over any of these activities | ___/___                  |
|                                   | 5d      | Composition, roles, and responsibilities of the coordinating centre, steering committee, endpoint adjudication committee, data management team, and other individuals or groups overseeing the trial, if applicable (see Item 21a for data monitoring committee)                         | ___3___                  |

## Introduction

|                          |    |                                                                                                                                                                                                           |   |
|--------------------------|----|-----------------------------------------------------------------------------------------------------------------------------------------------------------------------------------------------------------|---|
| Background and rationale | 6a | Description of research question and justification for undertaking the trial, including summary of relevant studies (published and unpublished) examining benefits and harms for each intervention        | 4 |
|                          | 6b | Explanation for choice of comparators                                                                                                                                                                     | 5 |
| Objectives               | 7  | Specific objectives or hypotheses                                                                                                                                                                         | 5 |
| Trial design             | 8  | Description of trial design including type of trial (eg, parallel group, crossover, factorial, single group), allocation ratio, and framework (eg, superiority, equivalence, noninferiority, exploratory) | 5 |

## Methods: Participants, interventions, and outcomes

|                      |     |                                                                                                                                                                                                                                                                                                                                                                                |      |
|----------------------|-----|--------------------------------------------------------------------------------------------------------------------------------------------------------------------------------------------------------------------------------------------------------------------------------------------------------------------------------------------------------------------------------|------|
| Study setting        | 9   | Description of study settings (eg, community clinic, academic hospital) and list of countries where data will be collected. Reference to where list of study sites can be obtained                                                                                                                                                                                             | 5    |
| Eligibility criteria | 10  | Inclusion and exclusion criteria for participants. If applicable, eligibility criteria for study centres and individuals who will perform the interventions (eg, surgeons, psychotherapists)                                                                                                                                                                                   | 6-7  |
| Interventions        | 11a | Interventions for each group with sufficient detail to allow replication, including how and when they will be administered                                                                                                                                                                                                                                                     | 7-8  |
|                      | 11b | Criteria for discontinuing or modifying allocated interventions for a given trial participant (eg, drug dose change in response to harms, participant request, or improving/worsening disease)                                                                                                                                                                                 | /    |
|                      | 11c | Strategies to improve adherence to intervention protocols, and any procedures for monitoring adherence (eg, drug tablet return, laboratory tests)                                                                                                                                                                                                                              | 5-6  |
|                      | 11d | Relevant concomitant care and interventions that are permitted or prohibited during the trial                                                                                                                                                                                                                                                                                  | /    |
| Outcomes             | 12  | Primary, secondary, and other outcomes, including the specific measurement variable (eg, systolic blood pressure), analysis metric (eg, change from baseline, final value, time to event), method of aggregation (eg, median, proportion), and time point for each outcome. Explanation of the clinical relevance of chosen efficacy and harm outcomes is strongly recommended | 7-10 |
| Participant timeline | 13  | Time schedule of enrolment, interventions (including any run-ins and washouts), assessments, and visits for participants. A schematic diagram is highly recommended (see Figure)                                                                                                                                                                                               | 6    |

1  
2  
3  
4  
5  
6  
7  
8  
9  
10  
11  
12  
13  
14  
15  
16  
17  
18  
19  
20  
21  
22  
23  
24  
25  
26  
27  
28  
29  
30  
31  
32  
33  
34  
35  
36  
37  
38  
39  
40  
41  
42  
43  
44  
45  
46  
47

Sample size 14 Estimated number of participants needed to achieve study objectives and how it was determined, including clinical and statistical assumptions supporting any sample size calculations \_\_\_11\_\_\_

Recruitment 15 Strategies for achieving adequate participant enrolment to reach target sample size \_\_\_11\_\_\_

**Methods: Assignment of interventions (for controlled trials)**

Allocation:

Sequence generation 16a Method of generating the allocation sequence (eg, computer-generated random numbers), and list of any factors for stratification. To reduce predictability of a random sequence, details of any planned restriction (eg, blocking) should be provided in a separate document that is unavailable to those who enrol participants or assign interventions \_\_\_10\_\_\_

Allocation concealment mechanism 16b Mechanism of implementing the allocation sequence (eg, central telephone; sequentially numbered, opaque, sealed envelopes), describing any steps to conceal the sequence until interventions are assigned \_\_\_10\_\_\_

Implementation 16c Who will generate the allocation sequence, who will enrol participants, and who will assign participants to interventions \_\_\_10-11\_\_\_

Blinding (masking) 17a Who will be blinded after assignment to interventions (eg, trial participants, care providers, outcome assessors, data analysts), and how \_\_\_10-11\_\_\_

17b If blinded, circumstances under which unblinding is permissible, and procedure for revealing a participant's allocated intervention during the trial \_\_\_/\_\_\_

**Methods: Data collection, management, and analysis**

Data collection methods 18a Plans for assessment and collection of outcome, baseline, and other trial data, including any related processes to promote data quality (eg, duplicate measurements, training of assessors) and a description of study instruments (eg, questionnaires, laboratory tests) along with their reliability and validity, if known. Reference to where data collection forms can be found, if not in the protocol \_\_\_5-6\_\_\_

18b Plans to promote participant retention and complete follow-up, including list of any outcome data to be collected for participants who discontinue or deviate from intervention protocols \_\_\_5-6\_\_\_

|    |                     |     |                                                                                                                                                                                                                                                                   |             |
|----|---------------------|-----|-------------------------------------------------------------------------------------------------------------------------------------------------------------------------------------------------------------------------------------------------------------------|-------------|
| 1  |                     |     |                                                                                                                                                                                                                                                                   |             |
| 2  |                     |     |                                                                                                                                                                                                                                                                   |             |
| 3  | Data management     | 19  | Plans for data entry, coding, security, and storage, including any related processes to promote data quality (eg, double data entry; range checks for data values). Reference to where details of data management procedures can be found, if not in the protocol | _10-11_____ |
| 4  |                     |     |                                                                                                                                                                                                                                                                   |             |
| 5  |                     |     |                                                                                                                                                                                                                                                                   |             |
| 6  |                     |     |                                                                                                                                                                                                                                                                   |             |
| 7  | Statistical methods | 20a | Statistical methods for analysing primary and secondary outcomes. Reference to where other details of the statistical analysis plan can be found, if not in the protocol                                                                                          | _11_____    |
| 8  |                     |     |                                                                                                                                                                                                                                                                   |             |
| 9  |                     |     |                                                                                                                                                                                                                                                                   |             |
| 10 |                     | 20b | Methods for any additional analyses (eg, subgroup and adjusted analyses)                                                                                                                                                                                          | _11_____    |
| 11 |                     |     |                                                                                                                                                                                                                                                                   |             |
| 12 |                     | 20c | Definition of analysis population relating to protocol non-adherence (eg, as randomised analysis), and any statistical methods to handle missing data (eg, multiple imputation)                                                                                   | _11_____    |
| 13 |                     |     |                                                                                                                                                                                                                                                                   |             |
| 14 |                     |     |                                                                                                                                                                                                                                                                   |             |

### 15 **Methods: Monitoring**

|    |                 |     |                                                                                                                                                                                                                                                                                                                                       |              |
|----|-----------------|-----|---------------------------------------------------------------------------------------------------------------------------------------------------------------------------------------------------------------------------------------------------------------------------------------------------------------------------------------|--------------|
| 16 |                 |     |                                                                                                                                                                                                                                                                                                                                       |              |
| 17 | Data monitoring | 21a | Composition of data monitoring committee (DMC); summary of its role and reporting structure; statement of whether it is independent from the sponsor and competing interests; and reference to where further details about its charter can be found, if not in the protocol. Alternatively, an explanation of why a DMC is not needed | _____12_____ |
| 18 |                 |     |                                                                                                                                                                                                                                                                                                                                       |              |
| 19 |                 |     |                                                                                                                                                                                                                                                                                                                                       |              |
| 20 |                 |     |                                                                                                                                                                                                                                                                                                                                       |              |
| 21 |                 |     |                                                                                                                                                                                                                                                                                                                                       |              |
| 22 |                 | 21b | Description of any interim analyses and stopping guidelines, including who will have access to these interim results and make the final decision to terminate the trial                                                                                                                                                               | _____/_____  |
| 23 |                 |     |                                                                                                                                                                                                                                                                                                                                       |              |
| 24 |                 |     |                                                                                                                                                                                                                                                                                                                                       |              |
| 25 | Harms           | 22  | Plans for collecting, assessing, reporting, and managing solicited and spontaneously reported adverse events and other unintended effects of trial interventions or trial conduct                                                                                                                                                     | _____/_____  |
| 26 |                 |     |                                                                                                                                                                                                                                                                                                                                       |              |
| 27 |                 |     |                                                                                                                                                                                                                                                                                                                                       |              |
| 28 | Auditing        | 23  | Frequency and procedures for auditing trial conduct, if any, and whether the process will be independent from investigators and the sponsor                                                                                                                                                                                           | _____/_____  |
| 29 |                 |     |                                                                                                                                                                                                                                                                                                                                       |              |
| 30 |                 |     |                                                                                                                                                                                                                                                                                                                                       |              |
| 31 |                 |     |                                                                                                                                                                                                                                                                                                                                       |              |

### 32 **Ethics and dissemination**

|    |                          |    |                                                                                                                                                                                                                                  |              |
|----|--------------------------|----|----------------------------------------------------------------------------------------------------------------------------------------------------------------------------------------------------------------------------------|--------------|
| 33 |                          |    |                                                                                                                                                                                                                                  |              |
| 34 | Research ethics approval | 24 | Plans for seeking research ethics committee/institutional review board (REC/IRB) approval                                                                                                                                        | _____12_____ |
| 35 |                          |    |                                                                                                                                                                                                                                  |              |
| 36 |                          |    |                                                                                                                                                                                                                                  |              |
| 37 | Protocol amendments      | 25 | Plans for communicating important protocol modifications (eg, changes to eligibility criteria, outcomes, analyses) to relevant parties (eg, investigators, REC/IRBs, trial participants, trial registries, journals, regulators) | _____/_____  |
| 38 |                          |    |                                                                                                                                                                                                                                  |              |
| 39 |                          |    |                                                                                                                                                                                                                                  |              |
| 40 |                          |    |                                                                                                                                                                                                                                  |              |
| 41 |                          |    |                                                                                                                                                                                                                                  |              |
| 42 |                          |    |                                                                                                                                                                                                                                  |              |
| 43 |                          |    |                                                                                                                                                                                                                                  |              |
| 44 |                          |    |                                                                                                                                                                                                                                  |              |
| 45 |                          |    |                                                                                                                                                                                                                                  |              |
| 46 |                          |    |                                                                                                                                                                                                                                  |              |
| 47 |                          |    |                                                                                                                                                                                                                                  |              |

1  
2  
3  
4  
5  
6  
7  
8  
9  
10  
11  
12  
13  
14  
15  
16  
17  
18  
19  
20  
21  
22  
23  
24  
25  
26  
27  
28  
29  
30  
31  
32  
33  
34  
35  
36  
37  
38  
39  
40  
41  
42  
43  
44  
45  
46  
47

|                               |     |                                                                                                                                                                                                                                                                                     |              |
|-------------------------------|-----|-------------------------------------------------------------------------------------------------------------------------------------------------------------------------------------------------------------------------------------------------------------------------------------|--------------|
| Consent or assent             | 26a | Who will obtain informed consent or assent from potential trial participants or authorised surrogates, and how (see Item 32)                                                                                                                                                        | _____12_____ |
|                               | 26b | Additional consent provisions for collection and use of participant data and biological specimens in ancillary studies, if applicable                                                                                                                                               | _____/_____  |
| Confidentiality               | 27  | How personal information about potential and enrolled participants will be collected, shared, and maintained in order to protect confidentiality before, during, and after the trial                                                                                                | _____12_____ |
| Declaration of interests      | 28  | Financial and other competing interests for principal investigators for the overall trial and each study site                                                                                                                                                                       | _____14_____ |
| Access to data                | 29  | Statement of who will have access to the final trial dataset, and disclosure of contractual agreements that limit such access for investigators                                                                                                                                     | _____12_____ |
| Ancillary and post-trial care | 30  | Provisions, if any, for ancillary and post-trial care, and for compensation to those who suffer harm from trial participation                                                                                                                                                       | _____/_____  |
| Dissemination policy          | 31a | Plans for investigators and sponsor to communicate trial results to participants, healthcare professionals, the public, and other relevant groups (eg, via publication, reporting in results databases, or other data sharing arrangements), including any publication restrictions | _____12_____ |
|                               | 31b | Authorship eligibility guidelines and any intended use of professional writers                                                                                                                                                                                                      | _____/_____  |
|                               | 31c | Plans, if any, for granting public access to the full protocol, participant-level dataset, and statistical code                                                                                                                                                                     | _____/_____  |
| <b>Appendices</b>             |     |                                                                                                                                                                                                                                                                                     |              |
| Informed consent materials    | 32  | Model consent form and other related documentation given to participants and authorised surrogates                                                                                                                                                                                  | _____/_____  |
| Biological specimens          | 33  | Plans for collection, laboratory evaluation, and storage of biological specimens for genetic or molecular analysis in the current trial and for future use in ancillary studies, if applicable                                                                                      | _____/_____  |

---

\*It is strongly recommended that this checklist be read in conjunction with the SPIRIT 2013 Explanation & Elaboration for important clarification on the items. Amendments to the protocol should be tracked and dated. The SPIRIT checklist is copyrighted by the SPIRIT Group under the Creative Commons "[Attribution-NonCommercial-NoDerivs 3.0 Unported](https://creativecommons.org/licenses/by-nc-nd/3.0/)" license.

# BMJ Open

## Preventive effect of oral magnesium in mastectomy-induced neuropathic pain: a randomized, double-blind, controlled clinical trial

|                                 |                                                                                                                                                                                                                                                                                                                                                            |
|---------------------------------|------------------------------------------------------------------------------------------------------------------------------------------------------------------------------------------------------------------------------------------------------------------------------------------------------------------------------------------------------------|
| Journal:                        | <i>BMJ Open</i>                                                                                                                                                                                                                                                                                                                                            |
| Manuscript ID                   | bmjopen-2017-017986.R1                                                                                                                                                                                                                                                                                                                                     |
| Article Type:                   | Protocol                                                                                                                                                                                                                                                                                                                                                   |
| Date Submitted by the Author:   | 14-Dec-2017                                                                                                                                                                                                                                                                                                                                                |
| Complete List of Authors:       | MOREL, Véronique; Centre Hospitalier Universitaire de Clermont-Ferrand, CPC/CIC Inserm 1405, Bât 3C<br>JOLY, Dominique; Centre Jean Perrin<br>VILLATTE, Christine; Centre Jean Perrin<br>Pereira, Bruno; University Hospital CHU Clermont-Ferrand,<br>PICKERING, Gisèle; Centre Hospitalier Universitaire de Clermont-Ferrand, CPC/CIC Inserm 1405, Bât 3C |
| <b>Primary Subject Heading</b>: | Oncology                                                                                                                                                                                                                                                                                                                                                   |
| Secondary Subject Heading:      | Pharmacology and therapeutics                                                                                                                                                                                                                                                                                                                              |
| Keywords:                       | Magnesium, NMDA receptor, breast cancer, mastectomy, neuropathic Pain                                                                                                                                                                                                                                                                                      |
|                                 |                                                                                                                                                                                                                                                                                                                                                            |

SCHOLARONE™  
Manuscripts

Only



1  
2  
3 1 **Preventive effect of oral magnesium in mastectomy-induced neuropathic pain: a**  
4  
5 2 **randomized, double-blind, controlled clinical trial**

6  
7 3 **Short running title**

8  
9 4 **Magnesium for neuropathic pain prevention**

10  
11 5 **Trial acronym: MagNet**

12  
13  
14 6  
15  
16 7 Véronique Morel<sup>c</sup>, Dominique Joly<sup>d</sup>, Christine Villatte<sup>d</sup>, Bruno Pereira<sup>e</sup>, Gisèle Pickering<sup>a,b,c</sup>,

17  
18  
19 8  
20 9 <sup>a</sup> Université Clermont Auvergne, Laboratoire de Pharmacologie, Facultés de  
21  
22 10 Médecine/Pharmacie, F-63001 Clermont-Ferrand, France.

23  
24 11 <sup>b</sup> Inserm, U1107 Neuro-Dol, Pharmacologie Fondamentale et Clinique de la Douleur, F-63001  
25  
26 12 Clermont-Ferrand, France.

27  
28 13 <sup>c</sup> CHU Clermont-Ferrand, Inserm CIC Inserm 1405, Centre de Pharmacologie Clinique, F-  
29  
30 14 63003 Clermont-Ferrand, France

31  
32 15 <sup>d</sup> CHU Clermont-Ferrand, Centre Jean Perrin, Centre de Lutte contre le Cancer, 58 rue  
33  
34 16 Montalembert, F-63000 Clermont-Ferrand, France.

35  
36 17 <sup>e</sup> CHU de Clermont-Ferrand, Délégation Recherche Clinique & Innovation - Villa annexe  
37  
38 18 IFSI, 58 Rue Montalembert, F-63003 Clermont-Ferrand cedex, France.

39  
40  
41 19  
42  
43 20 **Correspondence**

44  
45 21 Véronique MOREL, Centre de Pharmacologie Clinique, Bâtiment 3C, CIC Inserm 1405,  
46  
47 22 CHU Clermont-Ferrand, BP 69, F-63003 Clermont-Ferrand Cedex 1, France

48  
49 23 Tel: (+33) 4 73 17 84 11 / Fax: (+33) 4 73 17 84 12

50  
51 24 E-mail address: v\_morel@chu-clermontferrand.fr

52  
53  
54  
55  
56 25

## 1 **ABSTRACT**

2 **Introduction:** Breast cancer affects one in ten women worldwide and mastectomy is a cause  
3 of chronic pain with neuropathic characteristics. *N*-methyl-D-aspartate receptor (NMDAR)  
4 antagonists such as ketamine, memantine, dextromethorphan or magnesium, by blocking  
5 NMDAR are used for refractory pain. Oral memantine has been shown to prevent post-  
6 mastectomy pain, cognitive impact and maintain quality of life. In a similar fashion, this  
7 present study will evaluate the preventive effect of oral magnesium, given upstream of the  
8 mastectomy, on neuropathic pain development. As a physiological blocker of NMDAR,  
9 magnesium could be an interesting candidate to prevent post-operative pain and associated  
10 comorbidities, including cognitive-emotional disorders, multiple analgesics consumption and  
11 impaired quality of life.

12 **Methods and analysis:** A randomized, double-blind, controlled clinical trial (NCT  
13 03063931) includes 100 women with breast cancer undergoing mastectomy at the Oncology  
14 Hospital, Clermont-Ferrand, France. Magnesium (100 mg/day; n=50) or placebo (n=50) is  
15 administered for six weeks starting two weeks before surgery. Intensity of pain, cognitive-  
16 emotional function and quality of life are evaluated with questionnaires. The primary endpoint  
17 is pain intensity on a (0-10) numerical rating scale at 1 month post-mastectomy. Data analysis  
18 is performed using mixed models and the tests are two-sided, with a type I error set at  $\alpha=0.05$ .

19 **Ethics and dissemination:** The study protocol and the informed consent have been approved  
20 in December 2016 by the French Research Ethics Committee (South East VI Committee).  
21 Results will be communicated in different congress and published in international review.

22 **Trial registration number:** NCT03063931

## 23 **Keywords**

24 Magnesium, NMDA receptor, breast cancer, mastectomy, neuropathic Pain

1  
2  
3  
4  
5  
6  
7  
8  
9  
10  
11  
12  
13  
14  
15  
16  
17  
18  
19  
20  
21  
22  
23  
24  
25  
26  
27  
28  
29  
30  
31  
32  
33  
34  
35  
36  
37  
38  
39  
40  
41  
42  
43  
44  
45  
46  
47  
48  
49  
50  
51  
52  
53  
54  
55  
56  
57  
58  
59  
60

1     **Abbreviations**

2     NP, Neuropathic Pain; NMDAR, *N*-Methyl-D-Aspartate receptor

3     **Date and version identifier**

4     January 2 2017, Version: 3

5     **Sponsor**

6     CHU de Clermont-Ferrand – 58, rue Montalembert, BP 69, F-63003 Clermont-Ferrand Cedex

7     1, France

For peer review only

## 1 INTRODUCTION

2 Breast cancer is the most common cancer in women worldwide and the lifetime  
3 probability of developing breast cancer is 12.3%, approximately 1 in 8.<sup>1</sup> Mastectomy,  
4 chemotherapy and radiotherapy play an important role in the development of neuropathic  
5 pain.<sup>2</sup> Neuropathic pain is defined as pain related to a lesion or disease affecting the  
6 somatosensory system. The mechanisms responsible for spinal hyperexcitability include the  
7 activation of central and peripheral *N*-methyl-D-aspartate receptor (NMDAR).<sup>3,4</sup> These play  
8 an ubiquitous role in pain central sensitization and in many other functions like memory and  
9 learning.<sup>5-7</sup> Neuropathic pain is associated with the development of a number of comorbidities  
10 including cognitive-emotional and sleep disorders.<sup>8</sup> Post-mastectomy pain may be reported in  
11 the anterior thorax, armpit, upper arm, and edema, sensory dysfunction, neuroma emergence,  
12 numbness in the arm contribute to the pain syndrome that affects 20 to 68% of the patients.<sup>2</sup>  
13 NMDAR antagonists such as ketamine, memantine, dextromethorphan or magnesium by  
14 blocking NMDAR may limit or even reverse the painful phenomena and are possible drugs  
15 for pain refractory to recommended treatments.<sup>9-12</sup>

16 With a translational approach, the prophylactic effect of memantine in neuropathic  
17 pain was recently demonstrated in animals and in humans.<sup>12 13</sup> In a preclinical pain model  
18 (Spinal Nerve Ligation) memantine has been shown to prevent neuropathic pain development  
19 when administered a few days before surgery. Molecular biology tests showed a decrease of  
20 pTyr<sup>1472</sup>NR2B at spinal and supraspinal level (insula and hippocampus).<sup>13</sup> The translational  
21 clinical study confirmed the beneficial effect of memantine to prevent post-mastectomy pain  
22 development, diminish chemotherapy-induced pain symptoms and analgesic consumption,  
23 with a better quality of life for at least 6 months after surgery.<sup>12</sup>

24 Magnesium is a physiological NMDAR antagonist and blocks calcium and potassium  
25 channels of the receptor, modulating NMDAR activation with very few side-effects.<sup>14</sup>

1  
2  
3 1 Preclinical and clinical pain studies have reported the controverted curative effect of  
4  
5 2 magnesium on pain with satisfactory<sup>15-30</sup> and mitigated results.<sup>31-40</sup> No study has so far  
6  
7 3 focused the effect of several weeks oral administration of magnesium starting two weeks  
8  
9 4 before surgery on post-operative pain and more specifically in post-operative pain related to  
10  
11 5 breast cancer surgery.

12  
13 6 In the present study, magnesium will be administered before surgery in order to  
14  
15 7 evaluate its effect on pain development, cognition, emotion and quality of life during three  
16  
17 8 months after mastectomy. The primary objective is to evaluate if magnesium administered  
18  
19 9 two weeks before and 4 weeks after mastectomy may limit pain development at one month  
20  
21 10 post-mastectomy compared to placebo. The secondary objectives are the evaluation of pain  
22  
23 11 intensity, analgesic concomitant medications, cognitive-emotional function, quality of life and  
24  
25 12 sleep one and three months after mastectomy  
26  
27  
28  
29  
30

## 31 **METHODS AND ANALYSIS**

### 32 33 **Study setting**

34  
35 16 A randomized, placebo-controlled, double-blind clinical trial will be conducted in the  
36  
37 17 Oncology Hospital, Clermont-Ferrand, France, in 100 women undergoing total mastectomy  
38  
39 18 for breast cancer. The study has been approved in December 2016 by the regional Ethics  
40  
41 19 Committee and registered on February 24 2017 at "<http://www.clinicaltrials.gov>"  
42  
43 20 (NCT03063931). Three weeks before surgery (D<sub>-21</sub>), patients will meet the medical team and  
44  
45 21 the physician will explain to the patient the protocol, the objectives of the study and the  
46  
47 22 different questionnaires and tests that will be carried out in order for the patient to give her  
48  
49 23 written informed consent. If necessary, a sufficient time for reflection will be granted. After  
50  
51 24 having given informed consent, women will rate their pain on the numerical rating scale  
52  
53 25 (NRS) and complete the cognition, emotion, quality of life and sleep questionnaires. A blood  
54  
55  
56  
57  
58  
59  
60

1 test will be performed in order to dose the level of magnesium and creatinine, and participants  
2 will be randomized in two parallel groups: magnesium (n=50) or placebo (n=50). Patients will  
3 be contacted fifteen days before surgery in order to be reminded them to start their treatment.  
4 Magnesium or placebo (lactose) will be given orally for six weeks starting two weeks before  
5 surgery. Magnesium will be given at the dose of 100 mg/day (2 tablets of 50 mg/day once a  
6 day). Endpoints will be reassessed at one (M1) and three months (M3) post-mastectomy.  
7 Patients will be called once a week by phone in order to maintain a good compliance and to  
8 verify they do not develop adverse events. Finally, a booklet to monitor drug intake and  
9 adverse events will be completed daily by the patient for 3 months from the day of surgery  
10 (D<sub>0</sub>). Detailed information on the present study is summarized in Figure 1.

#### 11 **Inclusion criteria**

- 12 1. Patient is at least 18 years old.
- 13 2. Patient with a diagnosis of breast cancer and with planned total mastectomy with  
14 or without axillary dissection.
- 15 3. Patient with no change of treatment and diet.
- 16 4. Patient able to understand and agreeing to follow the study protocol.

#### 17 **Exclusion criteria**

- 18 1. Patient with any magnesium contraindication: hypersensitivity to magnesium  
19 chloride or to any of the excipients.
- 20 2. Patient with a magnesemia of more than 1.05 mmol/L.
- 21 3. Patient with severe renal insufficiency and with a renal clearance of less than 30  
22 mL/min.
- 23 4. Patient with an addiction to alcohol as diagnosed by the investigator.
- 24 5. Patient with diabetes (Type I and II).

- 1
- 2
- 3 1 6. Patient receiving treatment with quinidine or L-Dopa,
- 4
- 5 2 7. Patient in childbearing age, with no effective contraceptive method, pregnancy or
- 6
- 7 3 lactation,
- 8
- 9 4 8. Patient enrolled in another clinical trial.
- 10
- 11 5 9. Patient with an inability to comply with the requirements of the protocol.
- 12
- 13

## 14 6 **Intervention**

### 15 7 **Treatment group**

16 8 The treatment group will receive magnesium during six weeks starting two weeks before  
17 9 surgery. Patients in the magnesium group should take once a day 100 mg/day ((2 x 50 mg) of  
18 10 low dose continuous release magnesium stored in opaque white bottles in order to maintain  
19 11 double blinding (CHRONOMAG<sup>®</sup>, FJ Life Sciences).

### 20 12 **Control group**

21 13 Patients will receive once a day two tablets of placebo (lactose) during six weeks starting two  
22 14 weeks before mastectomy.

23 15 Magnesium and packaging will be provided by FJ Life Sciences Society. Placebo will  
24 16 be prepared, conditioned and released in the Hospital Central pharmacy by one qualified  
25 17 person according to good manufacturing principles. The number of tablets in each dispensed  
26 18 container will be verified and recounted at the end of the treatment by two persons totally  
27 19 independent of the protocol.

### 28 20 **Outcome evaluation**

29 21 The primary endpoint will be the average pain intensity evaluation by NRS in  
30 22 magnesium and placebo groups over the 5 days before the one month post-surgery visit. The  
31 23 scale ranges from 0 no pain to 10 maximal tolerable pain.

The following secondary endpoints will be evaluated at the screening visit, M1 and M3: 1) pain evaluation with NRS and the McGill pain questionnaire;<sup>41</sup> 2) neuropathic pain questionnaire with the neuropathic pain in four questions (DN4) and the Neuropathic Pain Symptom Inventory questionnaire (NPSI);<sup>42 43</sup> 3) cognition with the Trail Making Test (TMT) and the Functional Assessment of Cancer Therapy-Cognitive Function (FACT-COG);<sup>44 45</sup> 4) anxiety and depression with the Depression Anxiety Stress Scale (DASS);<sup>46</sup> 5) quality of life with European Organization for Research and Treatment of Cancer Quality of Life Questionnaire Core 30 items (EORTC QLQ-C30) and the Patient Global Impression of Change (PGIC) and 6) sleep with the Pittsburgh Sleep Quality Index (PSQI).<sup>47-49</sup> At the inclusion visit, M1 and M3, blood and urinary concentrations of magnesium will be measured. A summary of the evaluations for one patient is reported in table 1.

| TIMEPOINT                                                             | STUDY PERIOD |            |                 |    |           |
|-----------------------------------------------------------------------|--------------|------------|-----------------|----|-----------|
|                                                                       | Enrolment    | Allocation | Post-allocation |    | Close-out |
|                                                                       | D0-21        | D0-14      | D0              | M1 | M3        |
| <b>ENROLMENT:</b>                                                     |              |            |                 |    |           |
| Eligibility screen                                                    | X            |            |                 |    |           |
| Informed consent                                                      | X            |            |                 |    |           |
| Allocation                                                            |              | X          |                 |    |           |
| <b>INTERVENTIONS:</b>                                                 |              |            |                 |    |           |
| Start of treatment                                                    |              | X          |                 |    |           |
| End of treatment                                                      |              |            |                 | X  |           |
| Surgery                                                               |              |            | X               |    |           |
| Blood test                                                            | X            |            |                 | X  | X         |
| Urinary test                                                          |              |            |                 | X  | X         |
| Delivery pain diary                                                   |              |            | X               |    |           |
| <b>ASSESSMENTS:</b>                                                   |              |            |                 |    |           |
| Numeric Rating Scale (NRS)                                            | X            |            |                 | X  | X         |
| Neuropathic Pain four questions (DN4)                                 | X            |            |                 | X  | X         |
| Neuropathic Pain Symptom Inventory (NPSI)                             | X            |            |                 | X  | X         |
| McGill Pain questionnaire                                             | X            |            |                 | X  | X         |
| Trail Making Test (TMT)                                               | X            |            |                 | X  | X         |
| Functional Assessment of Cancer Therapy-Cognitive Function (FACT-COG) | X            |            |                 | X  | X         |
| EORTC QLQ-C30                                                         | X            |            |                 | X  | X         |
| Depression Anxiety Stress Scale (DASS)                                | X            |            |                 | X  | X         |
| Pittsburgh Sleep Quality Index (PSQI)                                 | X            |            |                 | X  | X         |
| Patient Global Impression of Change (PGIC)                            | X            |            |                 | X  | X         |
| Concomitant analgesic treatments                                      | X            | X          | X               | X  | X         |
| Adverse events                                                        |              | X          | X               | X  | X         |





1 connect the circles as quickly as possible for both parts of the test, without lifting the pen  
2 from the paper. The TMT B additionally provides an estimate of mental flexibility.

3 - *Functional Assessment of Cancer Therapy-Cognitive Function (FACT-COG)*<sup>45</sup>

4 This self-report questionnaire has been validated with cancer patients and assesses the  
5 impairment of cognitive ability and its impact on the patient's quality of life. It consists in 37  
6 items assessing memory, attention, concentration, language and thinking abilities. The items  
7 are rated using a 5-point Likert scale. The FACT-COG takes into consideration the functional  
8 implication of cognitive impairment, the deficits observed by other people, the changes in  
9 cognitive function over time, and their impact on the patient's quality of life.

10 - *Depression Anxiety Stress Scale*<sup>46</sup>

11 The DASS is a 42-item self-report instrument designed to measure the three related negative  
12 emotional states of depression, anxiety and tension/stress. The DASS Depression focuses on  
13 reports of low mood, motivation, and self-esteem, DASS-anxiety on physiological arousal,  
14 perceived panic, and fear, and DASS-stress on tension and irritability. A respondent indicates  
15 on a 4-point scale the extent to which each of 42 statements applied over the past week. A  
16 printed overlay is used to obtain total scores for each subscale. Higher scores on each subscale  
17 indicate increasing severity of depression, anxiety or stress.

18 - *European Organization for Research and Treatment of Cancer Quality of Life  
19 Questionnaire Core 30 items (EORTC QLQ-C30)*<sup>47</sup>

20 This questionnaire assesses the quality of life of cancer patients. It is divided in 9 subscales  
21 consisting of several items: 5 subscales measuring functional status (physical, role, social,  
22 emotional, cognitive), three subscales measuring symptoms (fatigue, pain, nausea and  
23 vomiting) and a global subscale of quality of life and health. Finally, six items/isolated  
24 symptoms, covering cancer symptoms and frequent side effects of cancer therapies are also  
25 included in the EORTC QLQ-C30.

1  
2  
3 1 - *Patient Global Impression of Change*<sup>48</sup>

4  
5 2 This is a 7-point self-reported numerical scale used to assess what the change in their  
6  
7 3 condition following treatment meant to the patient.

8  
9  
10 4 - *Pittsburgh Sleep Quality Index*<sup>49</sup>

11  
12 5 This questionnaire consists of 19 items and is used to measure sleep quality. It consists of 7  
13  
14 6 domains: subjective sleep quality, sleep latency, sleep duration, habitual sleep efficiency,  
15  
16 7 sleep disturbances, use of sleep medication and daytime dysfunction.

17  
18  
19 8 **Recruitment and Randomization**

20  
21 9 Three weeks before mastectomy, when the informed consent is signed, blood samples  
22  
23 10 (magnesium and creatinine concentrations) and questionnaires will be performed. Then,  
24  
25 11 patients will be randomized in the magnesium (n=50) or placebo group (n=50). Treatment  
26  
27 12 allocation will follow a predetermined randomization list and will be carried out by a person  
28  
29 13 totally independent from the protocol. The randomization sequence will be generated using  
30  
31 14 random blocks. Treatments will be packed in a similar opaque bottle covered with an identical  
32  
33 15 label indicating batch number, expiry date and sponsor code with no indication of the name of  
34  
35 16 the drug. In order to maintain blinding, the physician who evaluated pain could not guess  
36  
37 17 allocation at any time and would not meet the patient again in the course of the trial.

38  
39  
40  
41  
42 18 **Sample size calculation**

43  
44 19 Sample size estimation has been performed using Stata software (version 13, StataCorp,  
45  
46 20 College Station, US) with command `sampsi` based on usual sample size estimation.<sup>50</sup>  
47  
48 21 Considering the literature, the prevalence of post-mastectomy pain is 20%.<sup>51, 52</sup> However,  
49  
50 22 these data may vary depending on demographic, psychological and medical/surgical factors<sup>53</sup>  
51  
52 23 and will be taken into consideration in this study. The number of subjects required is 100  
53  
54 24 patients with breast cancer undergoing total mastectomy (50 in each group). The minimum  $\delta$

1 difference in numerical pain scale between magnesium and placebo groups at M1 is estimated  
2 at 1.0 and  $\sigma$  standard deviation at 1.5 with  $\alpha = 0.05$  two-sided type I error and  $\beta = 0.10$ .

### 3 **Statistical analysis**

4 Statistical analyses will be performed with Stata software (version 13; StataCorp, College  
5 Station, US). Concerning the primary objective, comparison between the randomized groups  
6 will be performed using the Student test or the Mann and Whitney test (if the conditions for  
7 validity of the Student test are not respected, normality verified by Shapiro-Wilk and  
8 homoscedasticity by Fisher-Snedecor test). If a high correlation between baseline and follow  
9 up scores is highlighted, an analysis of covariance with the baseline average NRS as a  
10 covariate will be proposed as multivariable analysis, as proposed by Vickers and Altman  
11 (Vickers and Altman, 2001).<sup>54</sup> This analysis can thus be expanded to include additional  
12 prognostic variables. The confounding factors likely to influence the primary endpoint (para-  
13 vertebral block, breast reconstruction with latissimus dorsi muscle flap, axillary dissection)  
14 will be taking into account in multivariate regression analysis. Concerning anesthesia, it is  
15 generally standardized and the authorized treatment will be noted. There will be a systematic  
16 adjustment for the main analysis. The analysis of repeated data (at the inclusion, M1 and M3)  
17 will be carried out by mixed models which allow to consider, on the one hand, time, group  
18 and their interaction *time x group* as fixed effects and on the other hand, the within and  
19 between subject variability. A sensitivity analysis will be considered to measure the impact of  
20 missing data and to assess the problem caused by missing longitudinal data at M3. A  
21 sensitivity analysis will be performed to measure the impact of missing data and to assess the  
22 problem caused by missing longitudinal data at M3. The nature of missing data will be  
23 studied (missing at random or not). According to this, the most appropriate approach to the  
24 imputation of missing data will be proposed: multiple imputation, maximum bias (last

1 observation carried forward vs baseline observation carried forward) or estimation proposed  
2 by Verbeke and Molenberghs for repeated data".<sup>55</sup>

### 3 **Data handling and record keeping**

4 All original records such as consent forms, Case Report Forms, questionnaires and pain diary  
5 will be archived at trial sites for 15 years. The database file will be anonymized and  
6 maintained also for 15 years. The monitoring will be performed by a clinical research  
7 associated independent from the protocol. Then, the monitored case report forms will be  
8 transferred to the Data Management Center (CIC-Inserm 1405, Clermont-Ferrand).

### 9 **Duration of the study**

10 The duration of treatment will be 42 days. The total duration of participation per patient will  
11 be of 14 weeks. The protocol will include 4 visits (D<sub>-21</sub>/D<sub>0</sub>/M1/M3) including a period of  
12 hospitalization per patient. Treatment will be given daily starting two weeks before surgery  
13 and maintained four weeks after. The recruitment will start in June 2017. The total duration of  
14 the study is estimated at two years.

### 15 **Ethics and dissemination**

16 The study received approval by the French Research Ethics Committee on December 2016  
17 (ID-RCB n° 2016-A01749-42). The trial is registered in ClinicalTrials.gov (trial n°  
18 NCT03063931). Each patient meeting the inclusion criteria will sign a Consent Form after  
19 receiving oral and written information. After agreement between all investigators, data will be  
20 disclosed and results will be communicated in different congress and published in  
21 international review.

## 22 **DISCUSSION**

23 Following successful results obtained with prophylactic memantine in neuropathic  
24 pain development,<sup>12 13</sup> this study aims at assessing magnesium treatment in a similar protocol

1 to prevent neuropathic pain induced by mastectomy. In breast cancer surgery, clinical studies  
2 using magnesium have focused so far on the qualitative and emotional aspects of pain rather  
3 than on the intensity of pain itself.<sup>56</sup> Magnesium in neuropathic pain alleviation has shown  
4 controverted results.<sup>19-40</sup> Magnesium has been shown to modulate the limbic system *via*  
5 NMDAR and these brain areas are known to be involved in emotion and pain.<sup>57</sup> It is therefore  
6 essential to evaluate concomitantly magnesium effect on pain and also on cognitive-emotional  
7 and sleep aspects. Magnesium deprivation may affect cognition and sleep quality. Preclinical  
8 findings showed that an increase in brain magnesium enhances both short-term synaptic  
9 facilitation and long-term potentiation and improves learning and memory functions.<sup>58</sup> In  
10 human, a study showed that preeclamptics patient receiving magnesium had better attention  
11 and working memory performance both before and after delivery compared to controls.<sup>59</sup>  
12 Furthermore, a review reported the relationship between low level of magnesium, stress and  
13 cognitive difficulties such as lack of concentration and difficulties in learning.<sup>60</sup> Concerning  
14 the impact of magnesium on sleep, a placebo-controlled, randomized cross-over study  
15 performed in 12 older participants showed that magnesium supplementation significantly  
16 reversed electroencephalogram changes, including decreased slow wave sleep, that may occur  
17 during aging.<sup>61</sup> Furthermore, a double blind trial reported that intraoperative infusion of  
18 magnesium led to a significantly better quality of sleep during the post-operative period  
19 without any side-effects.<sup>62</sup>

20 Magnesium is an abundant mineral, naturally present in food and is available as a  
21 dietary supplement that is appreciated by patients.<sup>63</sup> It is obtained without prescription and has  
22 a favourable risk-benefit balance with few side effects.<sup>63</sup> This molecule is also known to  
23 regulate diverse biochemical reactions in the body and is required for energy production,  
24 oxidative phosphorylation, and glycolysis. It also plays a role in the active transport of  
25 calcium and potassium ions across cell membranes, a process that is important to nerve

1  
2  
3 1 impulse conduction, muscle contraction, and normal heart rhythm.<sup>64 65</sup> Low blood levels of  
4  
5 2 magnesium have been associated with a number of pathologies including type-2 diabetes, or  
6  
7 3 cardio-vascular disease.<sup>66</sup> Oral magnesium supplementation is usually well tolerated and  
8  
9 4 gastrointestinal side effects including nausea, vomiting, and diarrhea are usually minor.<sup>66 67</sup>

10  
11 5 The pharmaceutical form in this trial provides magnesium chloride, a circulating form  
12  
13 6 of magnesium with a gradual and constant release of low doses of magnesium along the  
14  
15 7 gastro intestinal tract. A recent clinical study (NCT01935570) showed that the dose of 100 mg  
16  
17 8 daily guarantees an optimal absorption of magnesium by the body over a 24-hour period.  
18  
19 9 Furthermore, this form of magnesium does not induce intestinal side effects and is easy to use  
20  
21 10 with a once a day intake.

22  
23  
24 11 In conclusion, if magnesium given before and after mastectomy proves its efficacy in  
25  
26 12 neuropathic pain prevention, it could be an excellent prophylactic strategy to prevent post-  
27  
28 13 mastectomy pain symptoms, maintain quality of life and cognitive function and limit  
29  
30 14 comorbidities that accompany breast cancer pathology.

### 31 32 33 34 15 **Authors' contributions**

35  
36 16 GP is the overall study principal investigator; she participated in the conception and study  
37  
38 17 design and contributed to the writing of the study protocol and the drafting and editing of this  
39  
40 18 manuscript. DJ, CV and BP all participated in the study design. BP contributed to the writing  
41  
42 19 of the study protocol and carried out all statistical calculations and wrote the statistical  
43  
44 20 paragraph in the study protocol. He contributed with GP and VM to the drafting and editing of  
45  
46 21 this manuscript. All authors read and approved the final manuscript.

### 47 48 49 22 **Funding**

50  
51 23 University Hospital Clermont-Ferrand, France

### 52 53 54 24 **Competing interests**

1 The authors declare that there are no financial or non-financial competing interests neither  
2 within the conception nor conduction of the trial.

### 3 **References**

- 4 1. Rojas K, Stuckey A. Clin Obstet Gynecol. *Breast Cancer Epidemiology and Risk*  
5 *Factors*. 2016; 59(4):651-672.
- 6 2. Labrèze L, Lakdja F, Dixmérias F, and Monnin D. Les douleurs chroniques post-  
7 mastectomie. *Douleur et Analgésie* 2009; 22:30-37.
- 8 3. Collins S, Sigtermans MJ, Dahan A, Zuurmond WW, Perez RS. NMDA receptor  
9 antagonists for the treatment of neuropathic pain. *Pain Med* 2010; 11(11):1726-42.
- 10 4. Niesters M, and Dahan A. Pharmacokinetic and pharmacodynamic considerations  
11 for NMDA receptor antagonists in the treatment of chronic neuropathic pain.  
12 *Expert Opin. Drug Metab. Toxicol* 2012; 8:1409–1417.
- 13 5. Zhou HY, Chen SR, Pan HL. Targeting N-methyl-D-aspartate receptors for  
14 treatment of neuropathic pain. *Expert Rev Clin Pharmacol* 2011; 4(3):379-88.
- 15 6. Pickering, G. La voie glutamatergique: aspects physiologiques et  
16 pharmacologiques du récepteur NMDA. *Lett. Pharmacol. Supplément* 2010; 23:4-  
17 12.
- 18 7. Rogawski, MA, and Wenk, GL. The Neuropharmacological Basis for the Use of  
19 Memantine in the Treatment of Alzheimer's Disease. *CNS Drug Rev* 2003; 9:275–  
20 308.
- 21 8. Vandenbossche S, Fery P and Razavi D. Cognitive impairments and breast cancer:  
22 a critical review of the literature. *Bull Cancer* 2009;96:239-248.
- 23 9. Bell RF. Ketamine for chronic, non-cancer pain. *Pain* 2009;141:210-214.
- 24 10. Zhou HY, Chen SR, and Pan HL. Targeting N-methyl-D-aspartate receptors for  
25 treatment of neuropathic pain. *Expert Rev. Clin. Pharmacol* 2011;4:379–388.



1  
2  
3  
4  
5  
6  
7  
8  
9  
10  
11  
12  
13  
14  
15  
16  
17  
18  
19  
20  
21  
22  
23  
24  
25  
26  
27  
28  
29  
30  
31  
32  
33  
34  
35  
36  
37  
38  
39  
40  
41  
42  
43  
44  
45  
46  
47  
48  
49  
50  
51  
52  
53  
54  
55  
56  
57  
58  
59  
60

11. Ehret, G.B., Daali, Y., Chabert, J., Rebsamen, M., Wolff, A., Forster, A., Moursli, F., Fritschy, D., Rossier, M.F., Piguët, V., et al. Influence of CYP2D6 activity on pre-emptive analgesia by the N-methyl-D-aspartate antagonist dextromethorphan in a randomized controlled trial of acute pain. *Pain Physician* 2013; 16:45–56.
12. Morel V, Joly D, Villatte C, Dubray C, Durando X, Daulhac L, Coudert C, Roux D, Pereira B, Pickering G. Memantine before Mastectomy Prevents Post-Surgery Pain: A Randomized, Blinded Clinical Trial in Surgical Patients. *PLoS One* 2016; 11(4):e0152741.
13. Morel V, Etienne M, Wattiez AS, Dupuis A, Privat AM, Chalus M, Eschalier A, Daulhac L, Pickering G. Memantine, a promising drug for the prevention of neuropathic pain in rat. *Eur J Pharmacol* 2013;721(1-3):382-90.
14. Woolf CJ, Thompson SW. The induction and maintenance of central sensitization is dependent on N-methyl-d-aspartic acid receptor activation; implications for the treatment of post-injury pain hypersensitivity states. *Pain* 1991; 44:293–299.
15. Begon S, Pickering G, Eschalier A, Dubray C. Magnesium and MK-801 have a similar effect in two experimental models of neuropathic pain. *Brain Res* 2000; 887(2):436-9.
16. Begon S, Pickering G, Eschalier A, Dubray C. Magnesium increases morphine analgesic effect in different experimental models of pain. *Anesthesiology* 2002; 96(3):627-32.
17. Begon S, Pickering G, Eschalier A, Mazur A, Rayssiguier Y, Dubray C. Role of spinal NMDA receptors, protein kinase C and nitric oxide synthase in the hyperalgesia induced by magnesium deficiency in rats. *Br J Pharmacol* 2001; 134(6):1227-36.

- 1  
2  
3 1 18. Hasanein P, Parviz M, Keshavarz M, Javanmardi K, Mansoori M, Soltani N. Oral  
4  
5 2 magnesium administration prevents thermal hyperalgesia induced by diabetes in  
6  
7 3 rats. *Diabetes Res Clin Pract* 2006;73(1):17-22.  
8  
9 4 19. Apan A, Buyukkocak U, Ozcan S, Sari E, Basar H. Postoperative magnesium  
10  
11 5 sulphate infusion reduces analgesic requirements in spinal anaesthesia. *Eur J*  
12  
13 6 *Anaesthesiol* 2004; 21(10):766-9.  
14  
15 7 20. Kara H, Sahin N, Ulasan V, Aydogdu T. Magnesium infusion reduces  
16  
17 8 perioperative pain. *Eur J Anaesthesiol* 2002; 19(1):52-6.  
18  
19 9 21. Levaux Ch, Bonhomme V, Dewandre PY, Brichant JF, Hans P. Effect of intra-  
20  
21 10 operative magnesium sulphate on pain relief and patient comfort after major  
22  
23 11 lumbar orthopaedic surgery. *Anaesthesia* 2003; 58(2):131-5.  
24  
25 12 22. Shah PN, Dhengle Y. Magnesium sulfate for postoperative analgesia after surgery  
26  
27 13 under spinal anesthesia. *Acta Anaesthesiol Taiwan* 2016; 54(2):62-4.  
28  
29 14 23. Steinlechner B, Dworschak M, Birkenberg B, Grubhofer G, Weigl M, Schiferer A,  
30  
31 15 Lang T, Rajek A. Magnesium moderately decreases remifentanil dosage required  
32  
33 16 for pain management after cardiac surgery. *Br J Anaesth* 2006; 96(4):444-9.  
34  
35 17 24. Brill S, Sedgwick PM, Hamann W, Di Vadi PP. Efficacy of intravenous  
36  
37 18 magnesium in neuropathic pain. *Br J Anaesth* (2002); 89(5):711-4.  
38  
39 19 25. Crosby V, Wilcock A, Corcoran R. The safety and efficacy of a single dose (500  
40  
41 20 mg or 1 g) of intravenous magnesium sulfate in neuropathic pain poorly responsive  
42  
43 21 to strong opioid analgesics in patients with cancer. *J Pain Symptom Manage* 2000;  
44  
45 22 19(1):35-9.  
46  
47 23 26. Jaitly V. Efficacy of intravenous magnesium in neuropathic pain. *Br J Anaesth*  
48  
49 24 2003; 91(2):302.  
50  
51  
52  
53  
54  
55  
56  
57  
58  
59  
60

1  
2  
3  
4  
5  
6  
7  
8  
9  
10  
11  
12  
13  
14  
15  
16  
17  
18  
19  
20  
21  
22  
23  
24  
25  
26  
27  
28  
29  
30  
31  
32  
33  
34  
35  
36  
37  
38  
39  
40  
41  
42  
43  
44  
45  
46  
47  
48  
49  
50  
51  
52  
53  
54  
55  
56  
57  
58  
59  
60

- 1 27. Peikert A, Wilimzig C, Kohne-Volland R. Prophylaxis of migraine with oral  
2 magnesium: results from a prospective, multi-center, placebo-controlled and  
3 double-blind randomized study. *Cephalalgia* 1996;16(4):257-63.
- 4 28. Shechter M, Bairey Merz CN, Stuehlinger HG, Slany J, Pachinger O, Rabinowitz  
5 B. Effects of oral magnesium therapy on exercise tolerance, exercise-induced chest  
6 pain, and quality of life in patients with coronary artery disease. *Am J Cardiol*  
7 2003; 91(5):517-21.
- 8 29. Bhatia A, Kashyap L, Pawar DK, Trikha A. Effect of intraoperative magnesium  
9 infusion on perioperative analgesia in open cholecystectomy. *J Clin Anesth* 2004;  
10 16(4):262-5.
- 11 30. Tramer MR, Schneider J, Marti RA, Rifat K. Role of magnesium sulfate in  
12 postoperative analgesia. *Anesthesiology* 1996; 84(2):340-7.
- 13 31. Pfaffenrath V, Wessely P, Meyer C, Isler HR, Evers S, Grottemeyer KH, Taneri Z,  
14 Soyka D, Gobel H, Fischer M. (1996) Magnesium in the prophylaxis of migraine--  
15 a double-blind placebo-controlled study. *Cephalalgia* 1996;16(6):436-40.
- 16 32. Wang F, Van Den Eeden SK, Ackerson LM, Salk SE, Reince RH, Elin RJ. Oral  
17 magnesium oxide prophylaxis of frequent migrainous headache in children: a  
18 randomized, double-blind, placebo-controlled trial. *Headache* 2003; 43(6):601-10.
- 19 33. Baaklini LG, Arruda GV, Sakata RK. Assessment of the Analgesic Effect of  
20 Magnesium and Morphine in Combination in Patients With Cancer Pain: A  
21 Comparative Randomized Double-Blind Study. *Am J Hosp Palliat Care*  
22 2017;34(4):353-3572015.
- 23 34. Ko SH, Lim HR, Kim DC, Han YJ, Choe H, Song HS. Magnesium sulfate does  
24 not reduce postoperative analgesic requirements. *Anesthesiology* 2001; 95(3):640-  
25 6.

- 1  
2  
3 1 35. O'Flaherty JE, Lin CX. Does ketamine or magnesium affect posttonsillectomy pain  
4 in children? *Paediatr Anaesth* 2003; 13(5):413-21.  
5 2  
6  
7 3 36. Tramèr MR, Glynn CJ. An evaluation of a single dose of magnesium to  
8 supplement analgesia after ambulatory surgery: randomized controlled trial. *Anesth*  
9 4  
10 *Analg* 2007; 104(6):1374-9.  
11 5  
12  
13 6 37. Pickering G, Morel V, Simen E, Cardot JM, Moustafa F, Delage N, Picard P,  
14 7  
15 Eschalier S, Boulliau S, Dubray C. Oral magnesium treatment in patients with  
16 7  
17 neuropathic pain: a randomized clinical trial. *Magnes Res* 2011; 24(2):28-35.  
18 8  
19  
20 9 38. Zarauza R, Sáez-Fernández AN, Iribarren MJ, Carrascosa F, Adame M, Fidalgo I,  
21 10  
22 Monedero P. A comparative study with oral nifedipine, intravenous nimodipine,  
23 11  
24 and magnesium sulfate in postoperative analgesia. *Anesth Analg*. 2000  
25 12  
26 Oct;91(4):938-43.  
27 12  
28  
29 13 39. Felsby S, Nielsen J, Arendt-Nielsen L et al. NMDA receptor blockade in chronic  
30 14  
31 neuropathic pain: a comparison of ketamine and magnesium chloride. *Pain*  
32 15  
33 1996;64:283-91.  
34 15  
35  
36 16 40. Mikkelsen S, Dirks J, Fabricius P et al. Effect of intravenous magnesium on pain  
37 17  
38 and secondary hyperalgesia associated with the heat/capsaicin sensitization model  
39 18  
40 in healthy volunteers. *Br J Anaesth* 2001;86:871-3  
41 19  
42 19 41. Boureau F, Luu M, Doubrère JF. Comparative study of the validity of four French  
43 20  
44 McGill Pain Questionnaire (MPQ) versions. *Pain* 1992; 50(1):59-65.  
45 20  
46  
47 21 42. Bouhassira D, Attal N, Alchaar H, Boureau F, Brochet B, Bruxelle J, Cunin G,  
48 22  
49 Fermanian J, Ginies P, Grun-Overdyking A, Jafari-Schluep H, Lantéri-Minet M,  
50 23  
51 Laurent B, Mick G, Serrie A, Valade D, Vicaut E. Comparison of pain syndromes  
52 24  
53 associated with nervous or somatic lesions and development of a new neuropathic  
54 25  
55 pain diagnostic questionnaire (DN4). *Pain* 2005; 114(1-2):29-36.  
56  
57  
58  
59  
60

- 1  
2  
3 1 43. Bouhassira D, Attal N, Fermanian J, Alchaar H, Gautron M, Masquelier E,  
4 Rostaing S, Lanteri-Minet M, Collin E, Grisart J, Boureau F. Development and  
5 2 validation of the Neuropathic Pain Symptom Inventory. *Pain* 2004;108(3):248-57.  
6  
7 3  
8  
9 4 44. Tombaugh TN. Trail Making Test A and B: normative data stratified by age and  
10 education. *Arch Clin Neuropsychol* 2004;19(2):203-14.  
11 5  
12  
13 6 45. Wagner L, Sweet J, Butt Z, Lai J, Cella D. Measuring patient self-reported  
14 cognitive function: development of the functional assessment of cancer therapy-  
15 7 cognitive function instrument. *J Support Oncol* 2009;7:W32-9.  
16  
17 8  
18 9 46. Lovibond SH, Lovibond PF. Manual for the Depression Anxiety and Stress Scales  
19 (second edition). *Psychology Foundation*.  
20 10  
21 47. Aaronson NK, Ahmedzai S, Bergman B, Bullinger M, Cull A, Duez NJ, et al. The  
22 European Organization for Research and Treatment of Cancer QLQ-C30: a  
23 quality-of-life instrument for use in international clinical trials in oncology. *J Natl*  
24 *Cancer Inst* 1993;85:365-76.  
25 11  
26 12 48. Hurst H, Bolton J. Assessing the clinical significance of change scores recorded on  
27 subjective outcome measures. *J Manipulative Physiol Ther* 2004;27:26-35.  
28 13  
29 14 49. Buysse DJ, Reynolds CF, Monk TH, Berman SR, Kupfer DJ. The Pittsburgh Sleep  
30 Quality Index: a new instrument for psychiatric practice and research. *Psychiatry*  
31 *Res* 1989;28:193-213.  
32 15  
33 16 50. Machin D, Campbell MJ, Tan SB, Tan SH. Sample size tables for clinical studies.  
34 3rd ed. Chichester: Wiley-Blackwell 2009.  
35 17  
36 18 51. Stevens PE, Dibble SL, Miaskowski C: Prevalence, characteristics, and impact of  
37 postmastectomy pain syndrome: An investigation of women's experiences. *Pain*  
38 19  
39 20  
40 21  
41 22  
42 23  
43 24  
44  
45  
46  
47  
48  
49  
50  
51  
52  
53  
54  
55  
56  
57  
58  
59  
60

- 1  
2  
3 1 52. Smith WC, Bourne D, Squair J, Phillips DO, Chambers WA. A retrospective  
4  
5 2 cohort study of post mastectomy pain syndrome. *Pain* 1999;83(1):91-5.  
6  
7 3 53. Schreiber KL, Kehlet H, Belfer I, Edwards RR. Predicting, preventing and  
8  
9 4 managing persistent pain after breast cancer surgery: the importance of  
10  
11 5 psychosocial factors. *Pain Manag.* 2014; 4(6):445-59.  
12  
13 6 54. Vickers AJ, Altman DG: Statistics notes: analysing controlled trials with baseline  
14  
15 7 and follow up measurements. *BMJ* 2001;323: 1123-1124.  
16  
17  
18 8 55. Verbeke G, Fieuws S, Molenberghs G, Davidian MA. The analysis of multivariate  
19  
20 9 longitudinal data: review *Stat Methods Med Res* 2014, 23: 42-59.  
21  
22 10 56. Tao MH, Dai Q, Millen AE, Nie J, Edge SB, Trevisan M, Shields PG,  
23  
24 11 Freudenheim JL. Associations of intakes of magnesium and calcium and survival  
25  
26 12 among women with breast cancer: results from Western New York Exposures and  
27  
28 13 Breast Cancer (WEB) Study. *Am J Cancer Res* 2015. 6(1):105-13.  
29  
30 14 57. Bardgett ME, Schultheis PJ, McGill DL, Richmond RE, Wagge JR. Magnesium  
31  
32 15 deficiency impairs fear conditioning in mice. *Brain Res* 2005; 1038(1):100-6.  
33  
34 16 58. Slutsky I, Abumaria N, Wu LJ, Huang C, Zhang L, Li B, Zhao X, Govindarajan A,  
35  
36 17 Zhao MG, Zhuo M, Tonegawa S, Liu G. Enhancement of learning and memory by  
37  
38 18 elevating brain magnesium. *Neuron.* 2010 Jan 28;65(2):165-77.  
39  
40 19 59. Rana S, Lindheimer M, Hibbard J, Pliskin N. Neuropsychological performance in  
41  
42 20 normal pregnancy and preeclampsia. *Am J Obstet Gynecol.* 2006 Jul;195(1):186-  
43  
44 21 91. Epub 2006 Mar 31.  
45  
46 22 60. Moncayo R, Ortner K. Multifactorial determinants of cognition - Thyroid function  
47  
48 23 is not the only one. *BBA Clin.* 2015 Apr 22;3:289-98.  
49  
50  
51  
52  
53  
54  
55  
56  
57  
58  
59  
60

- 1  
2  
3 1 61. Held K, Antonijevic IA, Kunzel H, Uhr M, Wetter TC, Golly IC, Steiger A, Murck  
4  
5 2 H. Oral Mg (2+) supplementation reverses age-related neuroendocrine and sleep  
6  
7 3 EEG changes in humans. *Pharmacopsychiatry* 2002; 35: 135-43  
8  
9 4 62. Bhatia A1, Kashyap L, Pawar DK, Trikha A. Effect of intraoperative magnesium  
10  
11 5 infusion on perioperative analgesia in open cholecystectomy. *J Clin Anesth.* 2004  
12  
13 6 Jun;16(4):262-5.  
14  
15 7 63. National Institutes of Health Office of Dietary Supplements. Magnesium.  
16  
17 8 <http://ods.od.nih.gov/factsheets/magnesium.asp>. Accessed January 12, 2009.  
18  
19 9 64. Newhouse IJ, Finstad EW. The effects of magnesium supplementation on exercise  
20  
21 10 performance. *Clin J Sport Med.* 2000;10(3):195-200.  
22  
23 11 65. Chubanov V, Gudermann T, Schlingmann KP. Essential role for TRPM6 in  
24  
25 12 epithelial magnesium transport and body magnesium homeostasis. *Pflugers Arch.*  
26  
27 13 2005;451(1):228-234.  
28  
29 14 66. Guerrero MP, Volpe SL, Mao JJ. Therapeutic uses of magnesium. *Am Fam*  
30  
31 15 *Physician.* 2009 Jul 15;80(2):157-62.  
32  
33 16 67. McKevooy GK, ed. AHFS Drug Information. Bethesda, Md.: *American Society of*  
34  
35 17 *Health-System Pharmacists*; 1998.  
36  
37  
38  
39  
40  
41  
42  
43  
44  
45  
46  
47  
48  
49  
50  
51  
52  
53  
54  
55  
56  
57  
58  
59  
60

## 19 **Figure legends**

20 Figure 1: Study design

## 21 **Table legend**

22 Table 1: Summary of assessments

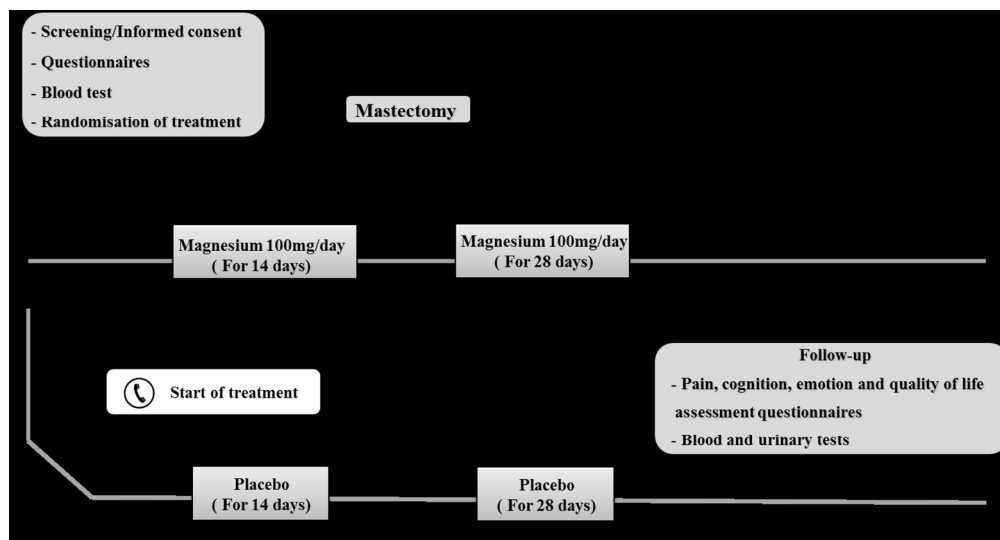

Study design

er review only





1  
2  
3  
4  
5  
6  
7  
8  
9  
10  
11  
12  
13  
14  
15  
16  
17  
18  
19  
20  
21  
22  
23  
24  
25  
26  
27  
28  
29  
30  
31  
32  
33  
34  
35  
36  
37  
38  
39  
40  
41  
42  
43  
44  
45  
46  
47

SPIRIT 2013 Checklist: Recommended items to address in a clinical trial protocol and related documents\*

| Section/item                      | Item No | Description                                                                                                                                                                                                                                                                              | Addressed on page number |
|-----------------------------------|---------|------------------------------------------------------------------------------------------------------------------------------------------------------------------------------------------------------------------------------------------------------------------------------------------|--------------------------|
| <b>Administrative information</b> |         |                                                                                                                                                                                                                                                                                          |                          |
| Title                             | 1       | Descriptive title identifying the study design, population, interventions, and, if applicable, trial acronym                                                                                                                                                                             | ___1___                  |
| Trial registration                | 2a      | Trial identifier and registry name. If not yet registered, name of intended registry                                                                                                                                                                                                     | ___2___                  |
|                                   | 2b      | All items from the World Health Organization Trial Registration Data Set                                                                                                                                                                                                                 | ___NA___                 |
| Protocol version                  | 3       | Date and version identifier                                                                                                                                                                                                                                                              | ___3___                  |
| Funding                           | 4       | Sources and types of financial, material, and other support                                                                                                                                                                                                                              | ___15___                 |
| Roles and responsibilities        | 5a      | Names, affiliations, and roles of protocol contributors                                                                                                                                                                                                                                  | ___1 and 3___            |
|                                   | 5b      | Name and contact information for the trial sponsor                                                                                                                                                                                                                                       | ___3___                  |
|                                   | 5c      | Role of study sponsor and funders, if any, in study design; collection, management, analysis, and interpretation of data; writing of the report; and the decision to submit the report for publication, including whether they will have ultimate authority over any of these activities | ___/___                  |
|                                   | 5d      | Composition, roles, and responsibilities of the coordinating centre, steering committee, endpoint adjudication committee, data management team, and other individuals or groups overseeing the trial, if applicable (see Item 21a for data monitoring committee)                         | ___15___                 |

### Introduction

|                          |    |                                                                                                                                                                                                           |   |
|--------------------------|----|-----------------------------------------------------------------------------------------------------------------------------------------------------------------------------------------------------------|---|
| Background and rationale | 6a | Description of research question and justification for undertaking the trial, including summary of relevant studies (published and unpublished) examining benefits and harms for each intervention        | 4 |
|                          | 6b | Explanation for choice of comparators                                                                                                                                                                     | 5 |
| Objectives               | 7  | Specific objectives or hypotheses                                                                                                                                                                         | 5 |
| Trial design             | 8  | Description of trial design including type of trial (eg, parallel group, crossover, factorial, single group), allocation ratio, and framework (eg, superiority, equivalence, noninferiority, exploratory) | 5 |

### Methods: Participants, interventions, and outcomes

|                      |     |                                                                                                                                                                                                                                                                                                                                                                                |      |
|----------------------|-----|--------------------------------------------------------------------------------------------------------------------------------------------------------------------------------------------------------------------------------------------------------------------------------------------------------------------------------------------------------------------------------|------|
| Study setting        | 9   | Description of study settings (eg, community clinic, academic hospital) and list of countries where data will be collected. Reference to where list of study sites can be obtained                                                                                                                                                                                             | 5    |
| Eligibility criteria | 10  | Inclusion and exclusion criteria for participants. If applicable, eligibility criteria for study centres and individuals who will perform the interventions (eg, surgeons, psychotherapists)                                                                                                                                                                                   | 6-7  |
| Interventions        | 11a | Interventions for each group with sufficient detail to allow replication, including how and when they will be administered                                                                                                                                                                                                                                                     | 7    |
|                      | 11b | Criteria for discontinuing or modifying allocated interventions for a given trial participant (eg, drug dose change in response to harms, participant request, or improving/worsening disease)                                                                                                                                                                                 | /    |
|                      | 11c | Strategies to improve adherence to intervention protocols, and any procedures for monitoring adherence (eg, drug tablet return, laboratory tests)                                                                                                                                                                                                                              | 5-6  |
|                      | 11d | Relevant concomitant care and interventions that are permitted or prohibited during the trial                                                                                                                                                                                                                                                                                  | /    |
| Outcomes             | 12  | Primary, secondary, and other outcomes, including the specific measurement variable (eg, systolic blood pressure), analysis metric (eg, change from baseline, final value, time to event), method of aggregation (eg, median, proportion), and time point for each outcome. Explanation of the clinical relevance of chosen efficacy and harm outcomes is strongly recommended | 7-11 |
| Participant timeline | 13  | Time schedule of enrolment, interventions (including any run-ins and washouts), assessments, and visits for participants. A schematic diagram is highly recommended (see Figure)                                                                                                                                                                                               | 6    |

1  
2  
3  
4  
5  
6  
7  
8  
9  
10  
11  
12  
13  
14  
15  
16  
17  
18  
19  
20  
21  
22  
23  
24  
25  
26  
27  
28  
29  
30  
31  
32  
33  
34  
35  
36  
37  
38  
39  
40  
41  
42  
43  
44  
45  
46  
47

Sample size 14 Estimated number of participants needed to achieve study objectives and how it was determined, including clinical and statistical assumptions supporting any sample size calculations \_11-12\_\_\_\_\_

Recruitment 15 Strategies for achieving adequate participant enrolment to reach target sample size \_\_\_11\_\_\_\_\_

**Methods: Assignment of interventions (for controlled trials)**

Allocation:

Sequence generation 16a Method of generating the allocation sequence (eg, computer-generated random numbers), and list of any factors for stratification. To reduce predictability of a random sequence, details of any planned restriction (eg, blocking) should be provided in a separate document that is unavailable to those who enrol participants or assign interventions \_\_\_11\_\_\_\_\_

Allocation concealment mechanism 16b Mechanism of implementing the allocation sequence (eg, central telephone; sequentially numbered, opaque, sealed envelopes), describing any steps to conceal the sequence until interventions are assigned \_\_\_11\_\_\_\_\_

Implementation 16c Who will generate the allocation sequence, who will enrol participants, and who will assign participants to interventions \_\_\_11\_\_\_\_\_

Blinding (masking) 17a Who will be blinded after assignment to interventions (eg, trial participants, care providers, outcome assessors, data analysts), and how \_\_\_11\_\_\_\_\_

17b If blinded, circumstances under which unblinding is permissible, and procedure for revealing a participant's allocated intervention during the trial \_\_\_\_\_/\_\_\_\_\_

**Methods: Data collection, management, and analysis**

Data collection methods 18a Plans for assessment and collection of outcome, baseline, and other trial data, including any related processes to promote data quality (eg, duplicate measurements, training of assessors) and a description of study instruments (eg, questionnaires, laboratory tests) along with their reliability and validity, if known. Reference to where data collection forms can be found, if not in the protocol \_\_\_5-6\_\_\_\_\_

18b Plans to promote participant retention and complete follow-up, including list of any outcome data to be collected for participants who discontinue or deviate from intervention protocols \_\_\_5-6\_\_\_\_\_

|    |                                 |     |                                                                                                                                                                                                                                                                                                                                       |             |
|----|---------------------------------|-----|---------------------------------------------------------------------------------------------------------------------------------------------------------------------------------------------------------------------------------------------------------------------------------------------------------------------------------------|-------------|
| 1  |                                 |     |                                                                                                                                                                                                                                                                                                                                       |             |
| 2  |                                 |     |                                                                                                                                                                                                                                                                                                                                       |             |
| 3  | Data management                 | 19  | Plans for data entry, coding, security, and storage, including any related processes to promote data quality (eg, double data entry; range checks for data values). Reference to where details of data management procedures can be found, if not in the protocol                                                                     | _11_____    |
| 4  |                                 |     |                                                                                                                                                                                                                                                                                                                                       |             |
| 5  |                                 |     |                                                                                                                                                                                                                                                                                                                                       |             |
| 6  |                                 |     |                                                                                                                                                                                                                                                                                                                                       |             |
| 7  | Statistical methods             | 20a | Statistical methods for analysing primary and secondary outcomes. Reference to where other details of the statistical analysis plan can be found, if not in the protocol                                                                                                                                                              | _12_____    |
| 8  |                                 |     |                                                                                                                                                                                                                                                                                                                                       |             |
| 9  |                                 |     |                                                                                                                                                                                                                                                                                                                                       |             |
| 10 |                                 | 20b | Methods for any additional analyses (eg, subgroup and adjusted analyses)                                                                                                                                                                                                                                                              | _12_____    |
| 11 |                                 |     |                                                                                                                                                                                                                                                                                                                                       |             |
| 12 |                                 | 20c | Definition of analysis population relating to protocol non-adherence (eg, as randomised analysis), and any statistical methods to handle missing data (eg, multiple imputation)                                                                                                                                                       | _12_____    |
| 13 |                                 |     |                                                                                                                                                                                                                                                                                                                                       |             |
| 14 |                                 |     |                                                                                                                                                                                                                                                                                                                                       |             |
| 15 | <b>Methods: Monitoring</b>      |     |                                                                                                                                                                                                                                                                                                                                       |             |
| 16 |                                 |     |                                                                                                                                                                                                                                                                                                                                       |             |
| 17 | Data monitoring                 | 21a | Composition of data monitoring committee (DMC); summary of its role and reporting structure; statement of whether it is independent from the sponsor and competing interests; and reference to where further details about its charter can be found, if not in the protocol. Alternatively, an explanation of why a DMC is not needed | _13_____    |
| 18 |                                 |     |                                                                                                                                                                                                                                                                                                                                       |             |
| 19 |                                 |     |                                                                                                                                                                                                                                                                                                                                       |             |
| 20 |                                 |     |                                                                                                                                                                                                                                                                                                                                       |             |
| 21 |                                 |     |                                                                                                                                                                                                                                                                                                                                       |             |
| 22 |                                 | 21b | Description of any interim analyses and stopping guidelines, including who will have access to these interim results and make the final decision to terminate the trial                                                                                                                                                               | _____/_____ |
| 23 |                                 |     |                                                                                                                                                                                                                                                                                                                                       |             |
| 24 |                                 |     |                                                                                                                                                                                                                                                                                                                                       |             |
| 25 | Harms                           | 22  | Plans for collecting, assessing, reporting, and managing solicited and spontaneously reported adverse events and other unintended effects of trial interventions or trial conduct                                                                                                                                                     | _____/_____ |
| 26 |                                 |     |                                                                                                                                                                                                                                                                                                                                       |             |
| 27 |                                 |     |                                                                                                                                                                                                                                                                                                                                       |             |
| 28 | Auditing                        | 23  | Frequency and procedures for auditing trial conduct, if any, and whether the process will be independent from investigators and the sponsor                                                                                                                                                                                           | _____/_____ |
| 29 |                                 |     |                                                                                                                                                                                                                                                                                                                                       |             |
| 30 |                                 |     |                                                                                                                                                                                                                                                                                                                                       |             |
| 31 |                                 |     |                                                                                                                                                                                                                                                                                                                                       |             |
| 32 | <b>Ethics and dissemination</b> |     |                                                                                                                                                                                                                                                                                                                                       |             |
| 33 |                                 |     |                                                                                                                                                                                                                                                                                                                                       |             |
| 34 | Research ethics approval        | 24  | Plans for seeking research ethics committee/institutional review board (REC/IRB) approval                                                                                                                                                                                                                                             | _13_____    |
| 35 |                                 |     |                                                                                                                                                                                                                                                                                                                                       |             |
| 36 |                                 |     |                                                                                                                                                                                                                                                                                                                                       |             |
| 37 | Protocol amendments             | 25  | Plans for communicating important protocol modifications (eg, changes to eligibility criteria, outcomes, analyses) to relevant parties (eg, investigators, REC/IRBs, trial participants, trial registries, journals, regulators)                                                                                                      | _____/_____ |
| 38 |                                 |     |                                                                                                                                                                                                                                                                                                                                       |             |
| 39 |                                 |     |                                                                                                                                                                                                                                                                                                                                       |             |
| 40 |                                 |     |                                                                                                                                                                                                                                                                                                                                       |             |
| 41 |                                 |     |                                                                                                                                                                                                                                                                                                                                       |             |
| 42 |                                 |     |                                                                                                                                                                                                                                                                                                                                       |             |
| 43 |                                 |     |                                                                                                                                                                                                                                                                                                                                       |             |
| 44 |                                 |     |                                                                                                                                                                                                                                                                                                                                       |             |
| 45 |                                 |     |                                                                                                                                                                                                                                                                                                                                       |             |
| 46 |                                 |     |                                                                                                                                                                                                                                                                                                                                       |             |
| 47 |                                 |     |                                                                                                                                                                                                                                                                                                                                       |             |

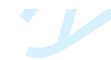

|    |                               |     |                                                                                                                                                                                                                                                                                     |          |
|----|-------------------------------|-----|-------------------------------------------------------------------------------------------------------------------------------------------------------------------------------------------------------------------------------------------------------------------------------------|----------|
| 1  |                               |     |                                                                                                                                                                                                                                                                                     |          |
| 2  |                               |     |                                                                                                                                                                                                                                                                                     |          |
| 3  | Consent or assent             | 26a | Who will obtain informed consent or assent from potential trial participants or authorised surrogates, and how (see Item 32)                                                                                                                                                        | ___13___ |
| 4  |                               |     |                                                                                                                                                                                                                                                                                     |          |
| 5  |                               |     |                                                                                                                                                                                                                                                                                     |          |
| 6  |                               | 26b | Additional consent provisions for collection and use of participant data and biological specimens in ancillary studies, if applicable                                                                                                                                               | ___/___  |
| 7  |                               |     |                                                                                                                                                                                                                                                                                     |          |
| 8  | Confidentiality               | 27  | How personal information about potential and enrolled participants will be collected, shared, and maintained in order to protect confidentiality before, during, and after the trial                                                                                                | ___13___ |
| 9  |                               |     |                                                                                                                                                                                                                                                                                     |          |
| 10 |                               |     |                                                                                                                                                                                                                                                                                     |          |
| 11 | Declaration of interests      | 28  | Financial and other competing interests for principal investigators for the overall trial and each study site                                                                                                                                                                       | ___15___ |
| 12 |                               |     |                                                                                                                                                                                                                                                                                     |          |
| 13 |                               |     |                                                                                                                                                                                                                                                                                     |          |
| 14 | Access to data                | 29  | Statement of who will have access to the final trial dataset, and disclosure of contractual agreements that limit such access for investigators                                                                                                                                     | ___13___ |
| 15 |                               |     |                                                                                                                                                                                                                                                                                     |          |
| 16 |                               |     |                                                                                                                                                                                                                                                                                     |          |
| 17 | Ancillary and post-trial care | 30  | Provisions, if any, for ancillary and post-trial care, and for compensation to those who suffer harm from trial participation                                                                                                                                                       | ___/___  |
| 18 |                               |     |                                                                                                                                                                                                                                                                                     |          |
| 19 |                               |     |                                                                                                                                                                                                                                                                                     |          |
| 20 | Dissemination policy          | 31a | Plans for investigators and sponsor to communicate trial results to participants, healthcare professionals, the public, and other relevant groups (eg, via publication, reporting in results databases, or other data sharing arrangements), including any publication restrictions | ___13___ |
| 21 |                               |     |                                                                                                                                                                                                                                                                                     |          |
| 22 |                               |     |                                                                                                                                                                                                                                                                                     |          |
| 23 |                               |     |                                                                                                                                                                                                                                                                                     |          |
| 24 |                               |     |                                                                                                                                                                                                                                                                                     |          |
| 25 |                               | 31b | Authorship eligibility guidelines and any intended use of professional writers                                                                                                                                                                                                      | ___/___  |
| 26 |                               |     |                                                                                                                                                                                                                                                                                     |          |
| 27 |                               | 31c | Plans, if any, for granting public access to the full protocol, participant-level dataset, and statistical code                                                                                                                                                                     | ___/___  |
| 28 |                               |     |                                                                                                                                                                                                                                                                                     |          |
| 29 | <b>Appendices</b>             |     |                                                                                                                                                                                                                                                                                     |          |
| 30 |                               |     |                                                                                                                                                                                                                                                                                     |          |
| 31 | Informed consent materials    | 32  | Model consent form and other related documentation given to participants and authorised surrogates                                                                                                                                                                                  | ___/___  |
| 32 |                               |     |                                                                                                                                                                                                                                                                                     |          |
| 33 |                               |     |                                                                                                                                                                                                                                                                                     |          |
| 34 | Biological specimens          | 33  | Plans for collection, laboratory evaluation, and storage of biological specimens for genetic or molecular analysis in the current trial and for future use in ancillary studies, if applicable                                                                                      | ___/___  |
| 35 |                               |     |                                                                                                                                                                                                                                                                                     |          |
| 36 |                               |     |                                                                                                                                                                                                                                                                                     |          |

37 \*It is strongly recommended that this checklist be read in conjunction with the SPIRIT 2013 Explanation & Elaboration for important clarification on the items.  
 38 Amendments to the protocol should be tracked and dated. The SPIRIT checklist is copyrighted by the SPIRIT Group under the Creative Commons  
 39 "[Attribution-NonCommercial-NoDerivs 3.0 Unported](https://creativecommons.org/licenses/by-nc-nd/3.0/)" license.  
 40
